# Resting state cerebral networks in mouse lemur primates: from multilevel validation to comparison with humans

Clément M. Garin<sup>1,2</sup>, Nachiket A. Nadkarni<sup>1,2</sup>, Brigitte Landeau<sup>3,4</sup>, Gaël Chételat<sup>3,4</sup>,  
Jean-Luc Picq<sup>1,2,5</sup>, Salma Bougacha<sup>1,2,3,4</sup>, Marc Dhenain<sup>1,2,\*</sup>

<sup>1</sup> Centre National de la Recherche Scientifique (CNRS), Université Paris-Sud, Université Paris-Saclay UMR 9199, Neurodegenerative Diseases Laboratory, 18 Route du Panorama, F-92265 Fontenay-aux-Roses, France

<sup>2</sup> Commissariat à l'Energie Atomique et aux Energies Alternatives (CEA), Direction de la Recherche Fondamentale (DRF), Institut François Jacob, MIRGen, 18 Route du Panorama, F-92265 Fontenay-aux-Roses, France

<sup>3</sup> Inserm, Inserm UMR-S U1237, Normandie Univ, UNICAEN, GIP Cyceron, Caen, France

<sup>4</sup> Normandie University, UNICAEN, EPHE, INSERM, U1077, CHU de Caen, Neuropsychologie et Imagerie de la Mémoire Humaine, 14000 Caen, France

<sup>5</sup> Laboratoire de Psychopathologie et de Neuropsychologie, EA 2027, Université Paris 8, 2 Rue de la Liberté, 93000 St Denis, France.

## Correspondance

Marc Dhenain  
MIRGen, UMR CEA-CNRS 9199  
18 Route du Panorama  
92 265 Fontenay-aux-Roses CEDEX  
France  
Tel: +33 1 46 54 81 92; Fax: +33 1 46 54 84 51  
email: [Marc.Dhenain@cea.fr](mailto:Marc.Dhenain@cea.fr)

## 1 **Abstract**

2 Measures of resting-state functional connectivity allow the description of neuronal  
3 networks in humans and provide a window on brain function in normal and  
4 pathological conditions. Animal models are critical to further address experimentally  
5 the function of brain networks and their roles in pathologies. Here we describe for the  
6 first time brain network organization in the mouse lemur (*Microcebus murinus*), a  
7 small primate attracting increased attention as a model for neuroscience. Resting-  
8 state functional MR images were recorded at 11.7 Tesla. Forty-eight functional  
9 regions were identified and used to identify networks using graph theory, dictionary  
10 learning and seed-based analyses. Comparison of results issued from these three  
11 complementary methods allowed the description of the most robust networks from  
12 mouse lemurs. Large scale networks were then identified from resting-state  
13 functional MR images of humans using the same method as for lemurs. Strong  
14 homologies were outlined between cerebral networks in mouse lemurs and humans.

15

## 16 **Keywords**

17 Brain function, Cerebral networks, Functional MRI, Graph theory, Human, *Microcebus*  
18 *murinus*, Mouse lemur, Primate, Resting state

## 19 **1. Introduction**

20 Blood-oxygen level dependent (BOLD) functional magnetic resonance imaging  
21 (fMRI) is largely used to investigate brain function in response to specific tasks. In the  
22 absence of explicit tasks (*i.e.* in resting state conditions) patterns of oscillations of the  
23 fMRI signal are similar in functionally connected brain structures (Biswal et al., 1995).  
24 The detection of the synchronicity of BOLD signal in various brain regions in resting  
25 state conditions can thus be used to describe cerebral network organization. In  
26 particular this allows the characterization of *i.* local regions in which highly  
27 coordinated neuronal activity occurs and *ii.* large scale networks composed of  
28 widespread functional regions connected together (Biswal et al., 1995; Power et al.,  
29 2014).

30 Studies of brain networks have contributed to many breakthroughs in the  
31 understanding of brain function in normal as well as in pathological conditions such  
32 as Alzheimer's or Parkinson's diseases (Buckner et al., 2005; Gao and Wu, 2016).  
33 However, many questions remain concerning both the technique and interpretation of  
34 resting state fMRI. For example, both the role of resting state networks in cerebral  
35 function, and the biological mechanisms underlying their activity, are still partly  
36 unknown. Also, how their modulations impact behaviour and cognition in pathological  
37 conditions is still debated (Mohan et al., 2016).

38 Using animal models is critical to further address these questions. Indeed, in  
39 animals it is possible to artificially stimulate neuronal activity to characterize biological  
40 mechanisms underlying network function (Gerits et al., 2012). Another interest of  
41 studying neuronal networks in animals is to evaluate how evolution has driven  
42 network architecture and to assess to what extent animal behaviours and ecology  
43 (Burkart et al., 2016) have impacted this architecture. Finally, animals can be used to  
44 model diseases and explore the impact of pathological processes on brain networks.

45 Various analysis pipelines have been proposed to investigate neuronal networks  
46 in humans and animals. For example, large scale networks were identified using  
47 data-driven methods relying on spatial map decomposition (dictionary learning  
48 (Varoquaux et al., 2011), independent component analysis (Damoiseaux et al.,  
49 2006)) or on graph theory (modularity analysis (Grayson et al., 2016)), as well as  
50 hypothesis-driven methods (seed-based analysis (Hutchison et al., 2014)). These  
51 methods are based on different algorithms and each one has its own inherent

52 advantages and disadvantages (Lee et al., 2013). They can provide complementary  
53 approaches for identifying networks in unexplored animals.

54 The mouse lemur (*Microcebus murinus*) is a primate attracting increased attention  
55 in neuroscience research. This small animal (typical length 12cm, 60-120g weight) is  
56 arboreal and nocturnal. It has a decade-long lifespan and is a model for studying  
57 cerebral aging (Sawiak et al., 2014) and various diseases such as diabetes-related  
58 encephalopathy (Djelti et al., 2016), Parkinson's disease (Mestre-Frances et al.,  
59 2018), or Alzheimer's disease (Kraska et al., 2011). It has a key position on  
60 phylogenetic trees of primates and is used to investigate primate brain evolution  
61 (Montgomery et al., 2010). Characterizing its cerebral networks is thus useful in the  
62 context of comparative biology as well as for further use of this animal to model  
63 various pathologies. Thus, the first aim of this study was to characterize neuronal  
64 networks in mouse lemurs. Our second objective was to implement a protocol that  
65 could define functional regions directly from resting-state fMR images and to  
66 compare large scale networks identified with data-driven and hypothesis-driven  
67 methods to assess the robustness of the identified networks. Our third objective was  
68 to compare resting state networks identified in lemurs with those identified in humans  
69 using the same procedure.

70 Resting state functional MR images were recorded from 14 mouse lemurs at 11.7  
71 Tesla. These images enabled the identification of 48 functional regions using  
72 dictionary learning (Varoquaux et al., 2011). These regions were concatenated into a  
73 3D functional atlas covering most of the brain and were used as nodes for whole  
74 brain network characterization. Large scale networks were identified using several  
75 methods based on graph theory, dictionary learning and seed-based analysis. They  
76 included default-mode-like, visual, fronto-temporal, somato-motor, basal ganglia and  
77 thalamic networks. These networks were then compared to large scale networks in  
78 humans. We found a strong homology between cerebral networks in mouse lemurs  
79 and humans.

## 80 2. Results

### 81 2.1. Identification of local functional regions and concatenation in a 3D 82 functional atlas

83 Resting state fMR images were recorded from 14 anaesthetised (isoflurane 1.25-  
84 1.5%) mouse lemurs at 11.7 Tesla (Suppl. Table 1). Images were recorded using a  
85 gradient-echo echo planar imaging (EPI) sequence. Each animal was scanned twice  
86 with an interval of 6 months.

87 Organisation of whole brain networks can be modelled using graph theory. During  
88 this modelling, whole brain networks are defined as a set of nodes (basic elements of  
89 the system) and edges (allowing relationships between nodes). The identification of  
90 nodes can be based on the use of anatomical atlases (Ghahremani et al., 2016) or  
91 on the use of study-specific functional atlases that identify local functional regions  
92 (Ma et al., 2018).

93 Here, we identified local functional regions by performing a dictionary learning  
94 based on a large number of sparse components (SCs). This method extracts maps of  
95 cerebral networks from fMRI data and relies on sparsity-based decomposition of the  
96 signal. Multi-animal dictionary learning analyses of resting state fMR images were  
97 performed in mouse lemurs using 35 components (Fig. 1). Each component was  
98 manually classified using anatomical (Bons et al., 1998; Nadkarni et al., 2018) and  
99 Brodmann atlases (Brodmann, 1999 (original in 1909); Le Gros Clark, 1931). First,  
100 brain regions were classified based on their locations within the frontal, parietal,  
101 temporal and occipital lobes as well as subcortical and midbrain regions. The 35  
102 components were used to create a 3D functional atlas of the brain (Fig. 2). Some  
103 single components were associated to bilateral structures as shown, for example, for  
104 the precentral cortex in Fig. 1. These bilateral regions were classified as two different  
105 regions (*i.e.* one in each hemisphere). Thus, 48 local functional regions (27 cortical,  
106 21 subcortical) could be extracted from the 35 component dictionary analysis (Table  
107 1). They can be downloaded from [https://www.nitrc.org/projects/fmri\\_mouselemur/](https://www.nitrc.org/projects/fmri_mouselemur/).

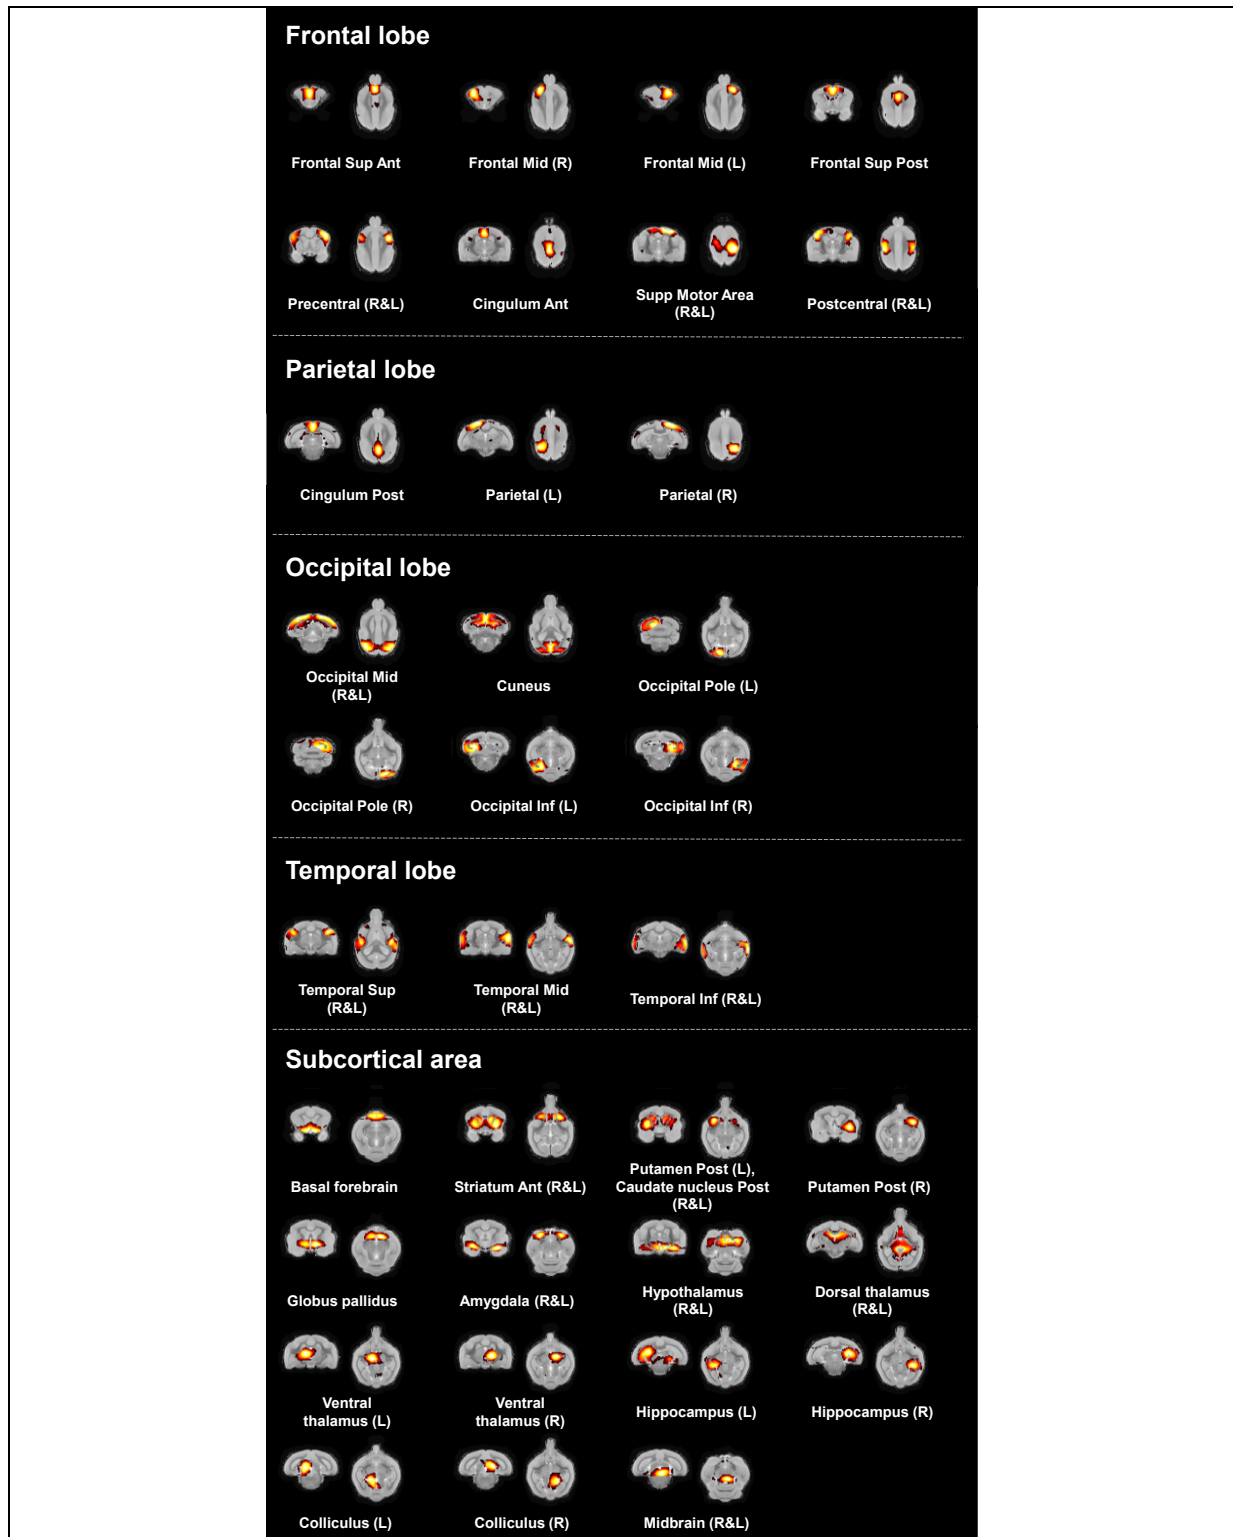

**Figure 1. Regions of functional activity identified in mouse lemurs.**

Regions of functional activity were identified following dictionary learning analyses of resting state fMR images using 35 components. They are shown on coronal and axial anatomical templates with an automatic slice selection based on the center of mass of each component. All components were organized within five anatomical areas: frontal, parietal, occipital, temporal, and subcortical regions.

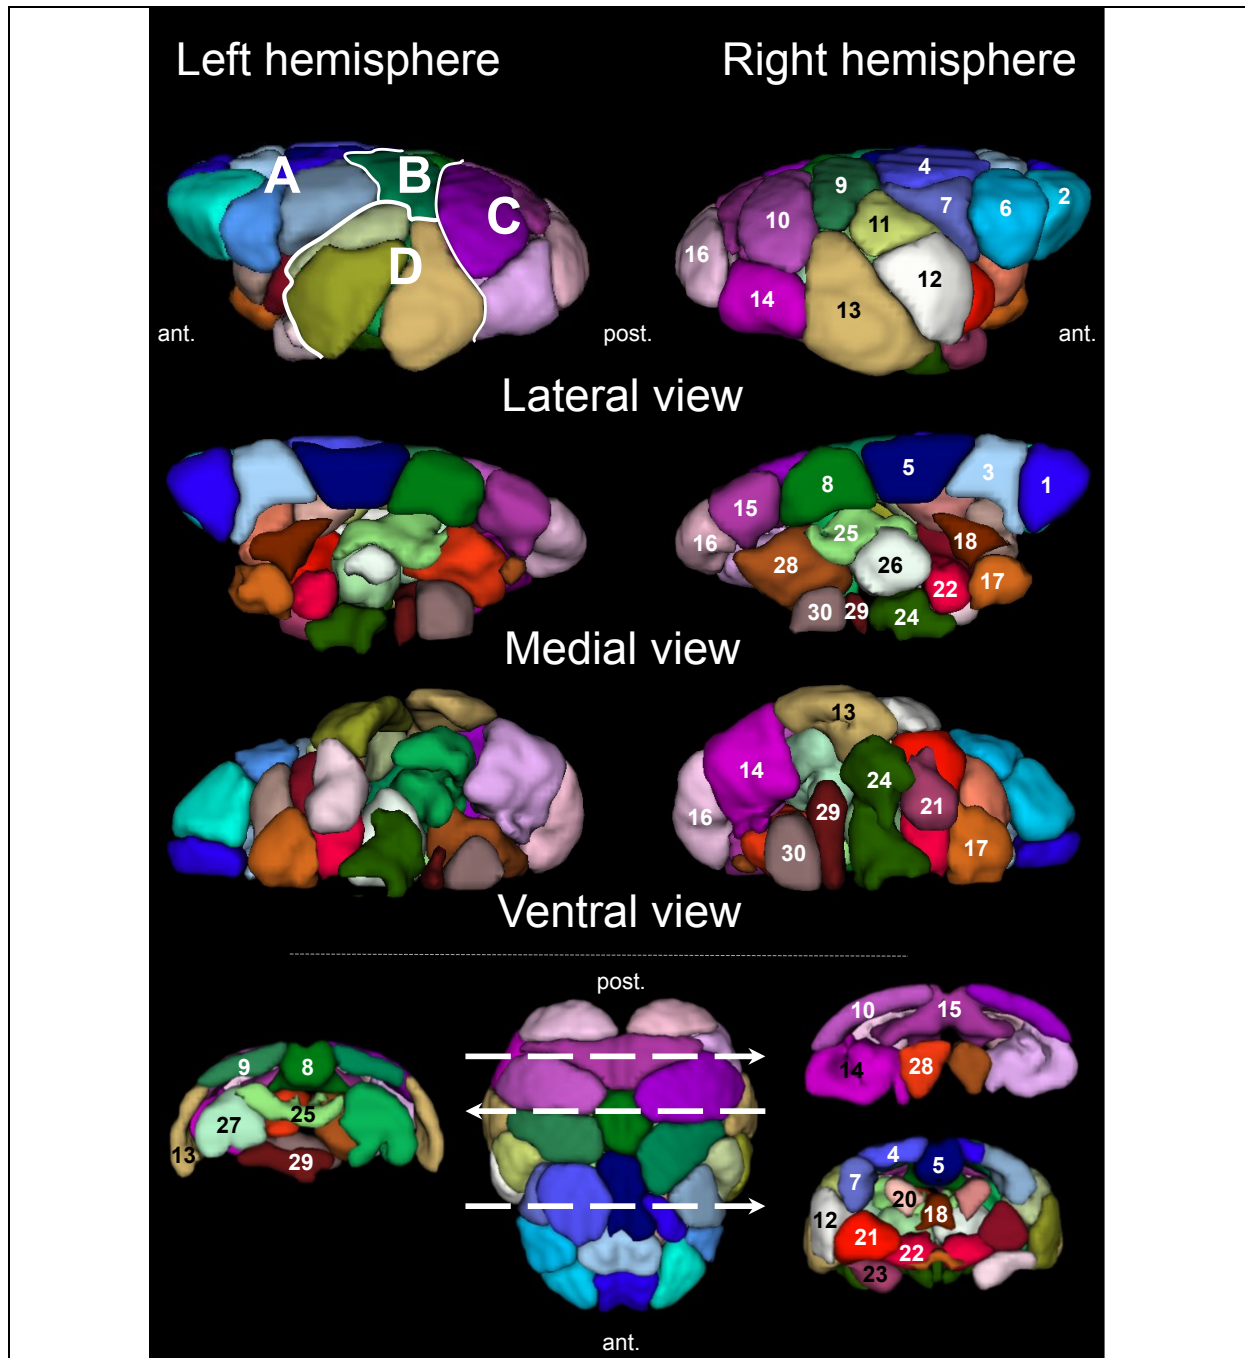

**Figure 2. Mouse lemur 3D functional atlas based on dictionary learning.**

Forty eight local functional regions were identified following dictionary learning analyses of resting state fMR images using 35 components. Brain regions were classified based on their locations within the frontal (A), parietal (B), occipital (C), and temporal (D) lobes. We display three different views and three slices extracted from the functional atlas. 1. Frontal Superior Anterior, 2. Frontal Middle, 3. Frontal Superior Posterior, 4. Supplementary Motor Area, 5. Cingulum Anterior, 6. Precentral, 7. Postcentral, 8. Cingulum Posterior, 9. Parietal, 10. Occipital Middle, 11. Temporal Superior, 12. Temporal Middle, 13. Temporal Inferior, 14. Occipital Inferior, 15. Cuneus, 16. Occipital Pole, 17. Basal forebrain, 18. Septal nuclei, 19. Striatum Anterior, 20. Caudate nucleus Posterior, 21. Putamen Posterior, 22. Globus pallidus, 23. Amygdala, 24. Hypothalamus, 25. Dorsal thalamus, 26. Ventral thalamus, 27. Hippocampus, 28. Colliculus, 29. Pons, 30. Midbrain.

109

|                            | <b>Label name</b>         | <b>Area</b> | <b>Function</b>                                      |
|----------------------------|---------------------------|-------------|------------------------------------------------------|
| <b>Frontal lobe</b>        | Frontal Sup Ant (1)       | 10/46       | task coordination                                    |
|                            | Frontal Mid (2)           | 45/12       | visual, auditory processing                          |
|                            | Frontal Sup Post (3)      | 8           | coordinated movements                                |
|                            | Supp Motor Area (4)       | 4           | primary motor                                        |
|                            | Cingulum Ant (5)          | 24          | multimodal                                           |
|                            | Precentral (6)            | 6           | secondary motor area                                 |
|                            | Postcentral (7)           | 1-3         | primary somatosensory                                |
| <b>Parietal lobe</b>       | Cingulum Post (8)         | 23          | multimodal                                           |
|                            | Parietal (9)              | 5<br>7      | secondary somatosensory<br>somatosensory association |
| <b>Temporal lobe</b>       | Temporal Sup (11)         | 22          | secondary auditory area                              |
|                            | Temporal Mid (12)         | 38/21       | auditory processing                                  |
|                            | Temporal Inf (13)         | 20          | secondary visual                                     |
| <b>Occipital lobe</b>      | Cuneus (15)               | 18          | visual processing                                    |
|                            | Occipital Mid (10)        | 18          | secondary visual area                                |
|                            | Occipital Inf (14)        | 37          | visual processing                                    |
|                            | Occipital Pole (16)       | 17          | primary visual                                       |
| <b>Subcortical regions</b> | Basal forebrain (17)      |             |                                                      |
|                            | Septal nuclei (18)        |             |                                                      |
|                            | Striatum Ant (19)         |             |                                                      |
|                            | Caudate nucleus Post (20) |             |                                                      |
|                            | Putamen Post (21)         |             |                                                      |
|                            | Globus pallidus (22)      |             |                                                      |
|                            | Amygdala (23)             |             |                                                      |
|                            | Hypothalamus (24)         |             |                                                      |
|                            | Dorsal thalamus (25)      |             |                                                      |
|                            | Ventral thalamus (26)     |             |                                                      |
|                            | Hippocampus (27)          |             |                                                      |
|                            | Colliculus (28)           |             |                                                      |
|                            | Pons (29)                 |             |                                                      |
| Midbrain (30)              |                           |             |                                                      |

110 **Table 1. Identification of functional regions of the mouse lemur brain.**  
111 Brain regions were classified based on their locations within the frontal, parietal,  
112 temporal, or occipital lobes as well as subcortical regions. Each labelled region was  
113 compared to cytoarchitectonic (Brodmann, 1999 (original in 1909); Le Gros Clark,  
114 1931) and anatomical atlases of the mouse lemur (Bons et al., 1998; Nadkarni et al.,  
115 2018) and of the human “AAL for SPM12” atlas (Tzourio-Mazoyer et al., 2002) to  
116 evaluate the Brodmann areas that were the closest to the identified regions. A  
117 function is also proposed for each region following expectations from Brodmann  
118 classification.



## 119 2.2. Large scale brain networks in mouse lemurs

120 The quantification of correlations of temporal evolution of BOLD fMRI signal  
121 between two regions (or nodes) provides an index of the “functional connectivity”  
122 between these nodes. Here, the 48 functional regions identified with the dictionary  
123 learning analysis were used as nodes for graph analysis of the mouse lemur brain. A  
124 3D-view of the mouse lemur network based on these 48 functional regions is  
125 presented in Suppl. Fig. 1. Partial correlation matrices were created using fully  
126 preprocessed MR images by calculating the partial correlation coefficients between  
127 temporal evolutions of BOLD MR signals within each region of this 3D functional  
128 network.

### 129 2.2.1. Modularity and large scale network identification based on graph 130 analysis

131 In graph theory, large scale networks are defined as community structure (or  
132 modules), which are groups of nodes connected densely and sparsely with nodes  
133 from other modules. The modularity of a partition (Q) is the degree to which a  
134 network can be subdivided into non-overlapping groups of nodes with maximum  
135 within-group connections and minimum number of between-group connections (D. B.  
136 Vincent et al., 2008). Here, the average partial correlation matrix was used to  
137 evaluate the modular structure of the mouse lemur brain by graph theory. Q was  
138 calculated to assess the ability of this weighted undirected matrix to be segregated  
139 into non-overlapping groups of nodes. A high modularity value (Q = 0.43) was  
140 obtained which suggests a prominent modular structure of mouse lemur brain  
141 networks. This modularity index was associated with the classification of the matrix  
142 into 6 modules (large scale networks) (Fig. 3, Suppl Table 2). Each functional region  
143 was associated with one and only one network. These networks were identified as:

144 M-1<sub>6</sub> – Default mode network-like (DMN-like). This module involved posterior  
145 and anterior cingulum, superior posterior frontal and parietal cortices. In other  
146 species, these regions are reported to be part of the DMN (Belcher et al., 2013;  
147 Hutchison et al., 2010; J. L. Vincent et al., 2007). This module also embedded nodes  
148 from the superior motor area and postcentral cortices.

149 M-2<sub>6</sub> – Visual. This module involved the cuneus, the occipital pole, the middle,  
150 the inferior occipital and the inferior temporal cortices. Those clusters correspond to  
151 visual areas and regions involved in integration of visual information.

152 M-3<sub>6</sub> – Frontal. This module involved nodes from frontal and precentral  
 153 cortices.

154 M-4<sub>6</sub> – Temporal. This module embedded temporal structures usually  
 155 implicated in response to auditory stimuli as well as the right posterior putamen.

156 M-5<sub>6</sub> – Basal ganglia. This module embedded the anterior striatum, the  
 157 posterior striatum (posterior caudate nucleus and posterior putamen), the amygdala,  
 158 basal forebrain, septal nuclei, as well as the hypothalamus and globus pallidus.

159 M-6<sub>6</sub> – Thalamic. This network involved a large number of subcortical regions  
 160 including and surrounding the thalamus, the hippocampus, the colliculi and the  
 161 midbrain.

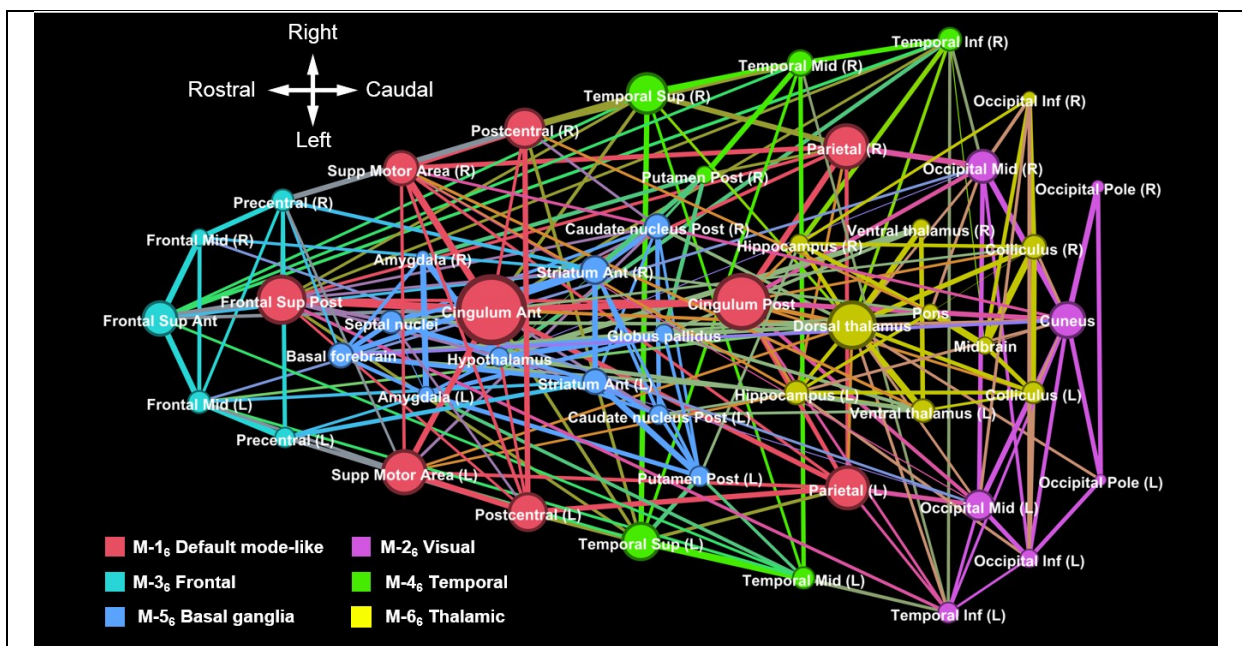

**Figure 3. Mouse lemur networks identified using graph analysis based on 48 functional regions.**

Using graph analysis, we partitioned the mouse lemur brain into six cortical and subcortical modules. A color and a name were assigned to each module. Colors highlight interactions between different nodes, *i.e.* they outline large scale networks. Eigenvector centrality, a measure of node influence, is represented by the node size.

162

### 2.2.2. Identification of large scale networks based on dictionary learning

We then wondered whether the six previously identified modules could be identified with dictionary learning analysis, another data-driven method. A six-component analysis revealed bilateral networks spread over the whole brain (Fig. 4, Suppl. Table 2). Four networks (the DMN, visual, basal ganglia and thalamic) were very similar to those identified with the module analysis. One network (fronto-temporal) was a concatenation of two networks identified by module analysis. The last network (somato-motor) was not identified with module analysis. Unlike for the graph analysis some functional regions (*e.g.* the anterior cingulate cortex) could be attributed to different networks (*e.g.* the DMN, fronto-temporal and somato-motor networks). More precisely, the networks were identified as:

SC-1<sub>6</sub> – DMN. This network involved structures identified with graph analysis (posterior and anterior cingulum cortices, superior posterior frontal and parietal cortices). Some nodes (superior motor area and postcentral cortices) identified as part of the DMN by graph analysis were not detected with dictionary learning.

SC-2<sub>6</sub> – Visual. This network involved the same nodes as those detected with module analysis (occipital pole, middle, inferior occipital and inferior temporal cortices), except the inferior temporal cortex.

SC-3<sub>6</sub> – Fronto-temporal. This network involved several regions that were identified as frontal or temporal network with graph analysis. It also included the anterior cingulum cortex.

SC-4<sub>6</sub> – Somato-motor. This network embedded frontal and parietal regions located above the Sylvian fissure (corresponding to Brodmann 1-3 (primary region involved in body sensation), 4 (primary motor region) and 6 (secondary motor region)) and temporal regions surrounding the Sylvian fissure. This network could thus be involved in somato-motor activities.

SC-5<sub>6</sub> – Basal ganglia. This network involved the same regions as those identified for this network with module analysis except for the hypothalamus and globus pallidus.

SC-6<sub>6</sub> – Thalamic. This last network involved mostly the same regions as the ones identified with graph analysis. In addition, it included the basal forebrain, septal nuclei and globus pallidus.

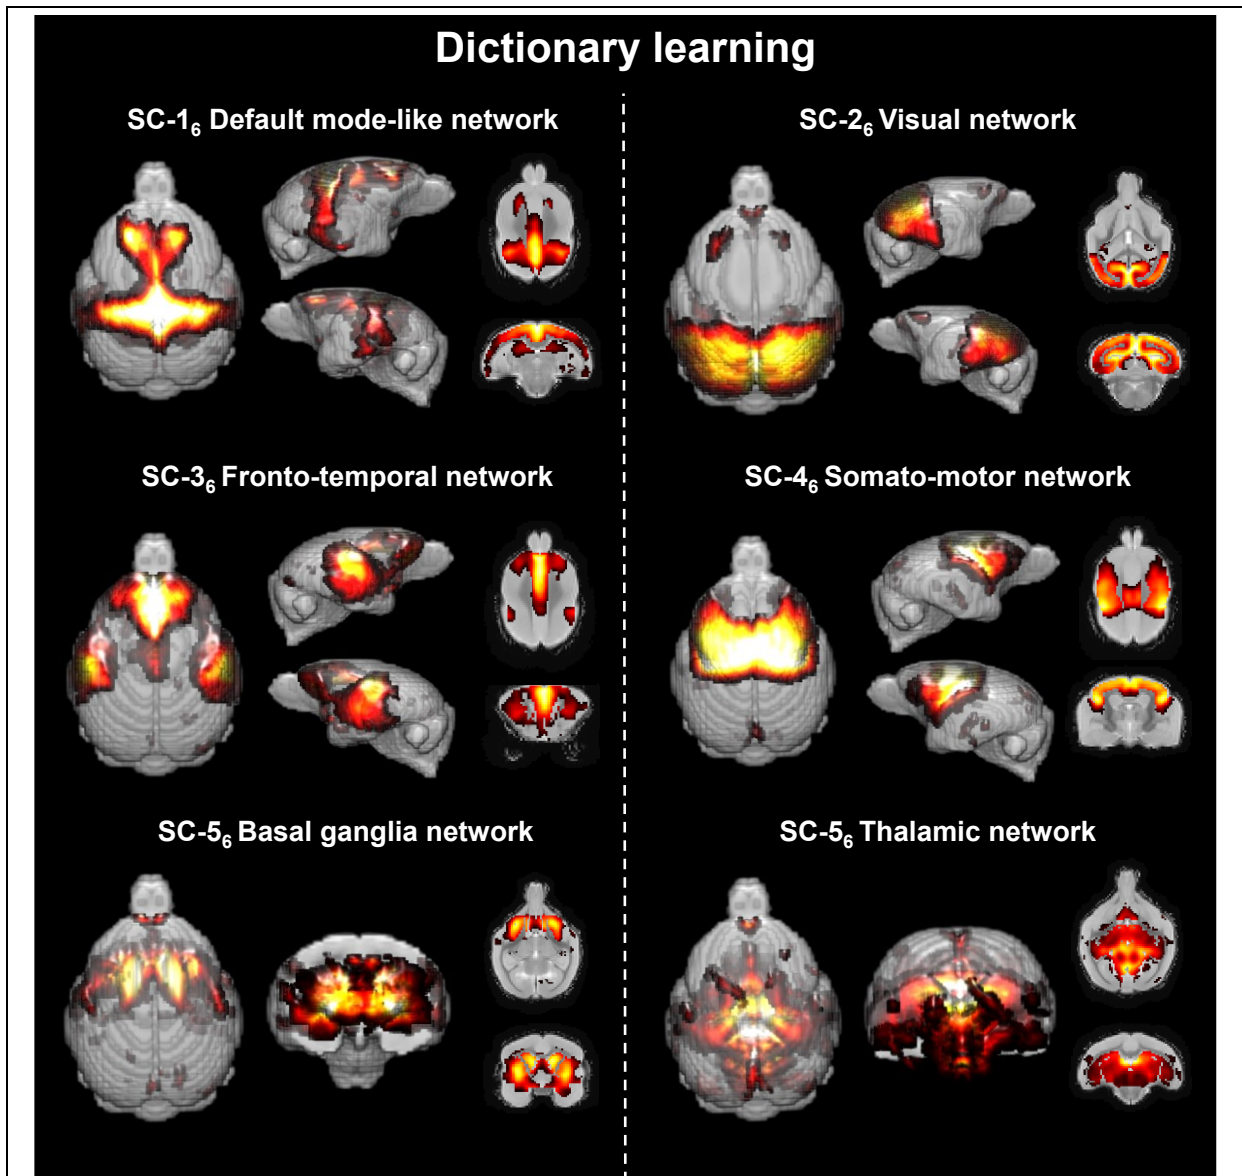

**Figure 4. Cerebral networks identified following six component dictionary learning in mouse lemurs.**

This analysis revealed bilateral networks that included several regions spread over the whole brain classified as default mode-like, visual, fronto-temporal, somato-motor, basal ganglia and thalamic networks.

### 2.2.3. Identification of large scale networks based on seed-based analysis

Another way to analyse cerebral networks is to perform seed-based studies. This method evaluates the relationships between mean BOLD signal in a brain region (seed) and BOLD signal in any voxel of the brain. Here, the seeds corresponded to the 48 previously identified functional regions. Some seeds were only connected with voxels from the same brain region and were not further explored (*i.e.* the visual and thalamic networks, SB-2<sub>6</sub> and SB-6<sub>6</sub> in Fig. 5). Four seeds were connected with voxels localized in brain networks previously described with the graph analysis and dictionary learning methods (*i.e.* the DMN, fronto-temporal, somato-motor and basal ganglia networks, Fig. 5). Two networks identified with other methods were not identified by seed-based analysis (the visual and thalamic networks). As for dictionary learning, some structures (*i.e.* the anterior cingulum cortex) could be attributed to different networks (Suppl. Table 2). More precisely, the networks highlighted by seed-based analysis are described as follows.

SB-1<sub>6</sub> – DMN. The seed from the posterior cingulum cortex (PCC) is usually used to define the DMN. Here, using this seed we highlighted highly connected voxels in the regions identified as DMN with graph analysis and dictionary learning methods (posterior and anterior cingulum cortices, superior posterior frontal and parietal cortices). Additional parts of this network were also identified (middle frontal cortex and dorsal thalamus).

SB-3<sub>6</sub> – Fronto-temporal. The seed from the left middle temporal cortex was connected with the right middle and superior temporal cortices, superior anterior frontal cortex, superior posterior frontal cortex and anterior cingulum cortex.

SB-4<sub>6</sub> – Somato-motor. Using a seed in the left superior motor area, we highlighted a network englobing several regions included in the somato-motor network identified by dictionary learning (fronto and parietal cortices, superior temporal regions, anterior cingulum cortex). Voxels from the middle frontal, superior posterior frontal cortex, posterior cingulum cortices as well as the posterior caudate nucleus and dorsal thalamus were also associated with this network.

SB-5<sub>6</sub> – Basal ganglia. Using the posterior caudate nucleus (left) as a seed, we highlighted a basal ganglia network that involved the striatum. It was already identified for this network with graph analysis and dictionary learning. Voxels from the

229 superior posterior frontal cortex and anterior cingulum cortices were also associated  
230 with this network.

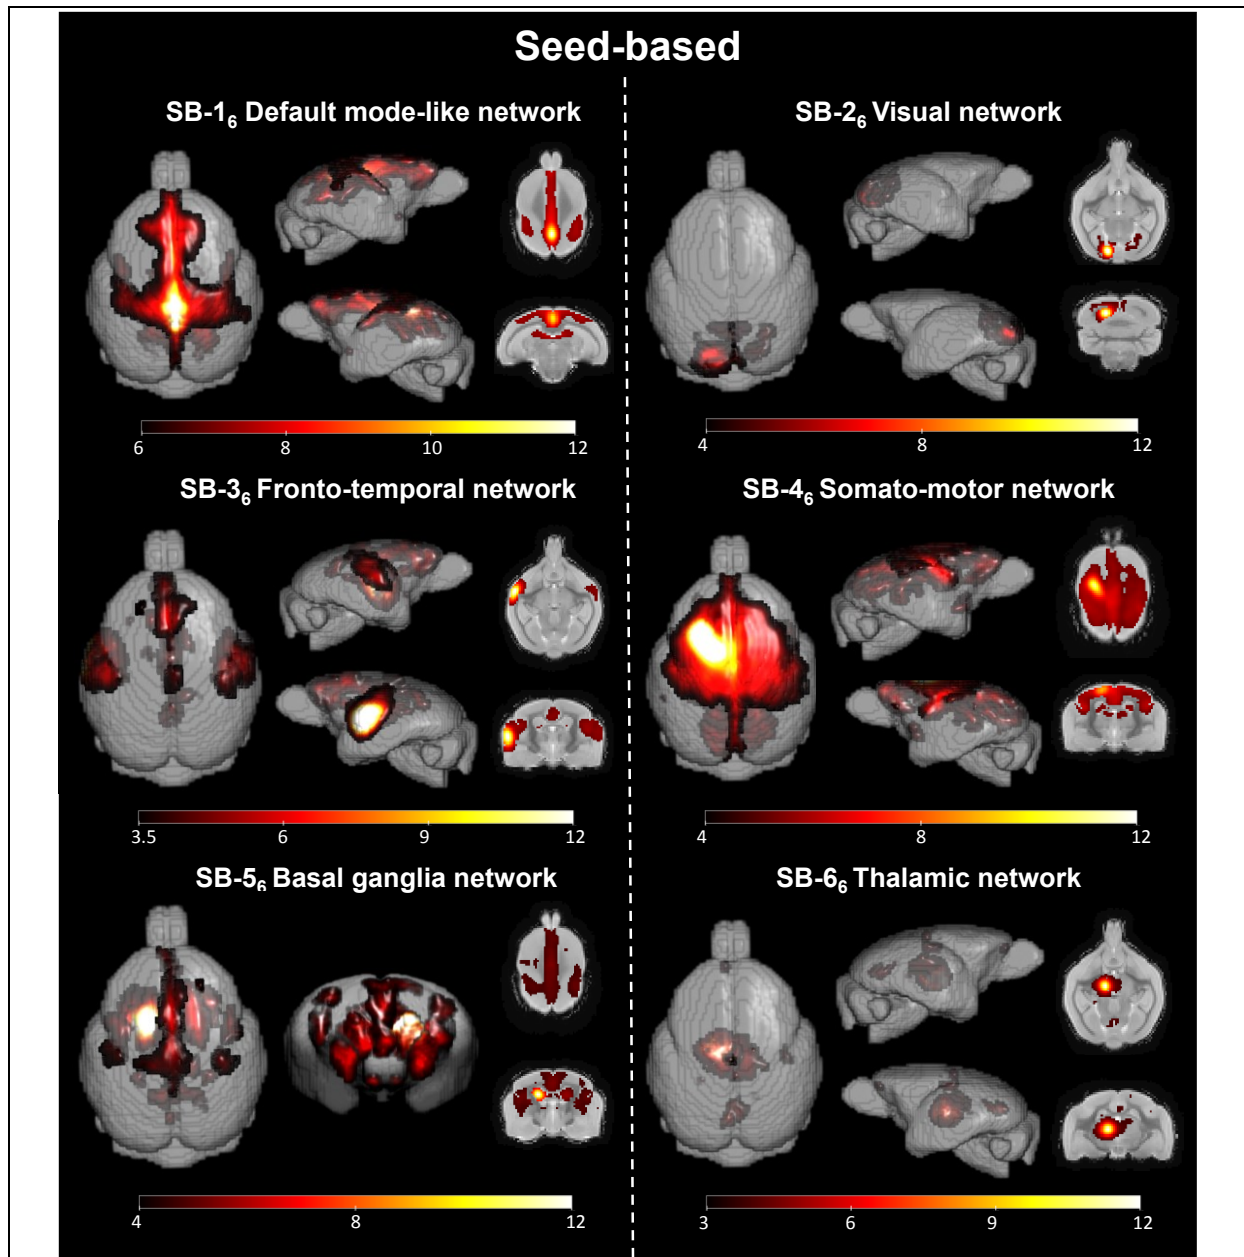

**Figure 5. Mouse lemur resting-state networks characterized with seed-based analysis.**

Each image highlights mean z-statistic maps of regions connected to a cerebral seed. Seed-based analysis detected four of the six previous large scale networks identified with dictionary learning: default mode-like, fronto-temporal, somato-motor, and basal ganglia (seeds positioned in the posterior cingulate cortex, the left medial temporal cortex, the left superior frontal cortex and the left posterior caudate nucleus, respectively). Visual and thalamic networks that were detected with dictionary learning were not detected with seed-based analysis: SB-2<sub>6</sub> and SB-6<sub>6</sub> display lack of large network detection using seeds in the left occipital cortex and the left ventral thalamus. Color bars represent z-statistic values.

## 231 2.3. Functional hubs and small-worldness features of mouse lemur brains

### 232 2.3.1. Brain hubs in mouse lemurs

233 Whole brain networks can also be characterized using various descriptors. One of  
234 these descriptors, "hubness", describes the centrality of nodes in the network. This is  
235 a measure of node influence within the whole brain network. It can be measured by  
236 eigenvector centrality. For each node, this index is mainly calculated based on its  
237 partial correlation values (edges) with all regions of the 3D functional atlas, weighted  
238 by the eigenvector scores of its neighbourhood nodes. In other words, nodes which  
239 display high eigenvector centrality scores are strongly linked to other nodes and/or to  
240 strongly connected nodes. Here, eigenvectors were presented as histograms (Fig. 6)  
241 or as the size of the nodes in the graphical representation of the networks (Fig. 3).  
242 The 3 nodes presenting the highest eigenvector centrality were the anterior cingulum  
243 cortex, the posterior cingulum cortex, and the superior posterior frontal cortex. These  
244 three regions belong to the DMN. The dorsal thalamus was the next region showing  
245 highest hubness properties. Then the following hubs involved the parietal cortex,  
246 superior motor area, as well as the superior temporal and postcentral cortices (Fig.  
247 6).

### 248 2.3.2. Small-worldness of mouse lemur brain networks

249 Network topology describes properties of regional specialization and global  
250 information transfer efficacy. It can be classified into three main classes: random,  
251 lattice and small-world networks (Telesford et al., 2011). Network topology can be  
252 characterized using two small-world coefficients ( $\sigma$  and  $\omega$ ) (NetworkX (Hagberg et  
253 al., 2008)). Small-world networks have  $\sigma$  values superior to 1 and  $\omega$  values close to 0  
254 (Telesford et al., 2011). In mouse lemurs these coefficients ( $\sigma = 1.47$  and  $\omega = 0.39$ )  
255 indicated small-world properties. Usually, mammal brains have small-worldness  
256 topology (Mechling et al., 2014).

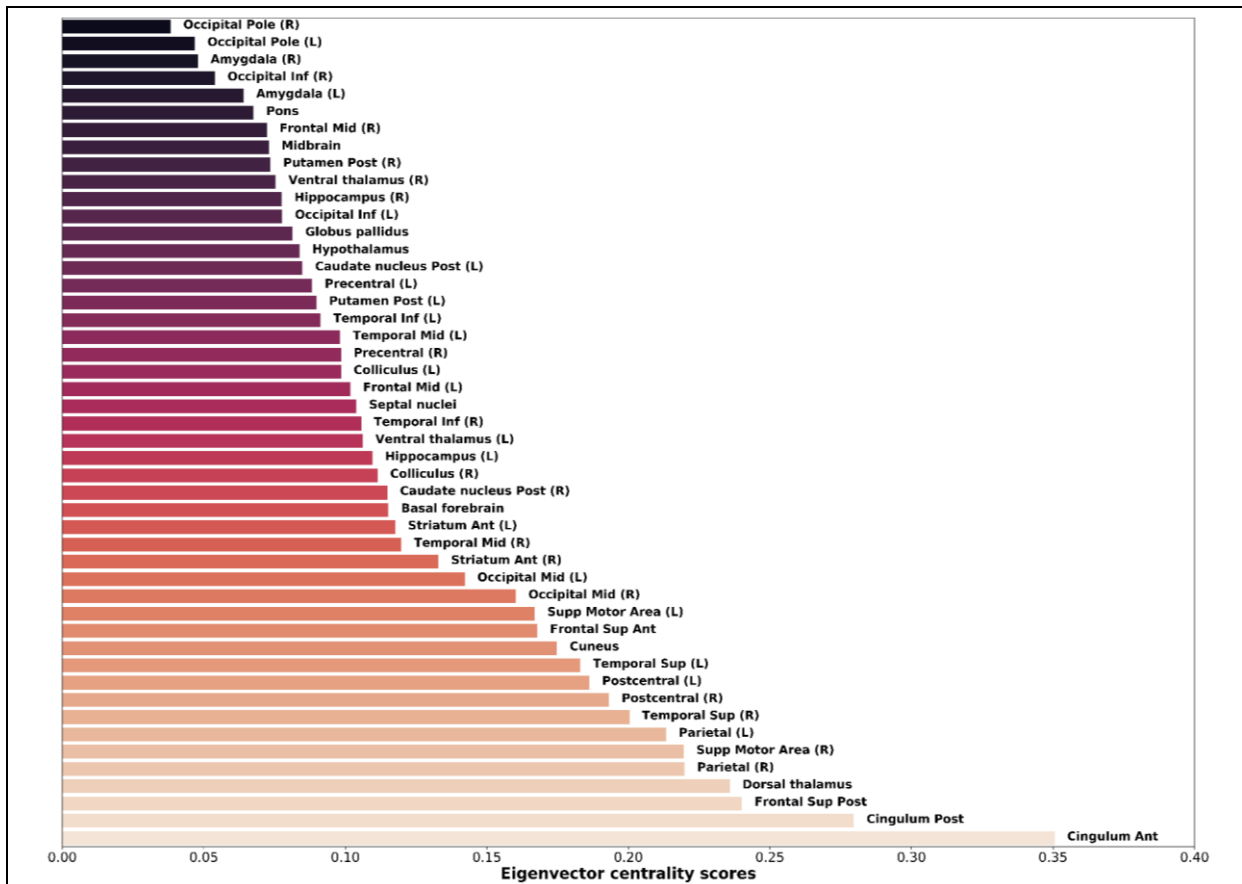

**Figure 6. Eigenvector centrality scores, reflecting "hubness", in mouse lemur brain regions.**

The three regions displaying the highest scores were the anterior cingulate cortex, the posterior cingulate cortex and the central frontal cortex. The dorsal thalamus was the next region showing highest hubness properties. Then the following hubs involved the parietal cortex, superior motor area, as well as the superior temporal and postcentral cortices.



## 258 2.4. Cerebral networks in humans

259 We then wondered how comparable mouse lemur and human brain networks are.  
260 To answer to this question, resting state fMRI data were recorded from 42 healthy  
261 humans ranging from 41 to 60 years old at 3.0 Tesla using an interleaved 2D T2\*  
262 SENSE EPI. Participants were asked to keep their eyes closed and relax without  
263 falling asleep during image acquisition. Human images were then processed with the  
264 same graph analysis and dictionary learning algorithms as mouse lemur images.

265 Local functional regions were identified using a dictionary learning based on 35  
266 components. Single components spread on bilateral structures were dissociated into  
267 two different regions (*i.e.* one in each hemisphere). Ultimately, the brain was  
268 partitioned into 56 local functional regions (55 cortical, 1 subcortical). They were  
269 named based on the “AAL for SPM12” atlas (Tzourio-Mazoyer et al., 2002) (Suppl.  
270 Fig. 2)

271 As for mouse lemurs, the 56 functional regions identified with the dictionary  
272 learning analysis were used as nodes for large scale network analysis. First, we  
273 calculated partial correlation coefficients between temporal evolutions of BOLD MR  
274 signals within each region of the 3D functional atlas. The obtained correlation matrix  
275 was used to calculate the matrix modularity value ( $Q = 0.56$ ). This index was  
276 associated with the segregation of the matrix into 6 modules that were classified as  
277 default mode, visual, frontal, temporal somato-motor, and temporo-insular networks  
278 (Suppl. Fig. 3).

279 Then large scale networks were further characterized in humans using a dictionary  
280 learning analysis with 6 components (Fig. 7, Table 2). The 6 networks identified could  
281 be classified as the default mode, visual, fronto-supramarginal (classified as control-  
282 executive network in (Solé-Padullés et al., 2016)), somato-motor, temporal, and a  
283 fronto-parietal network (classified as attention network in (Raichle, 2011)).

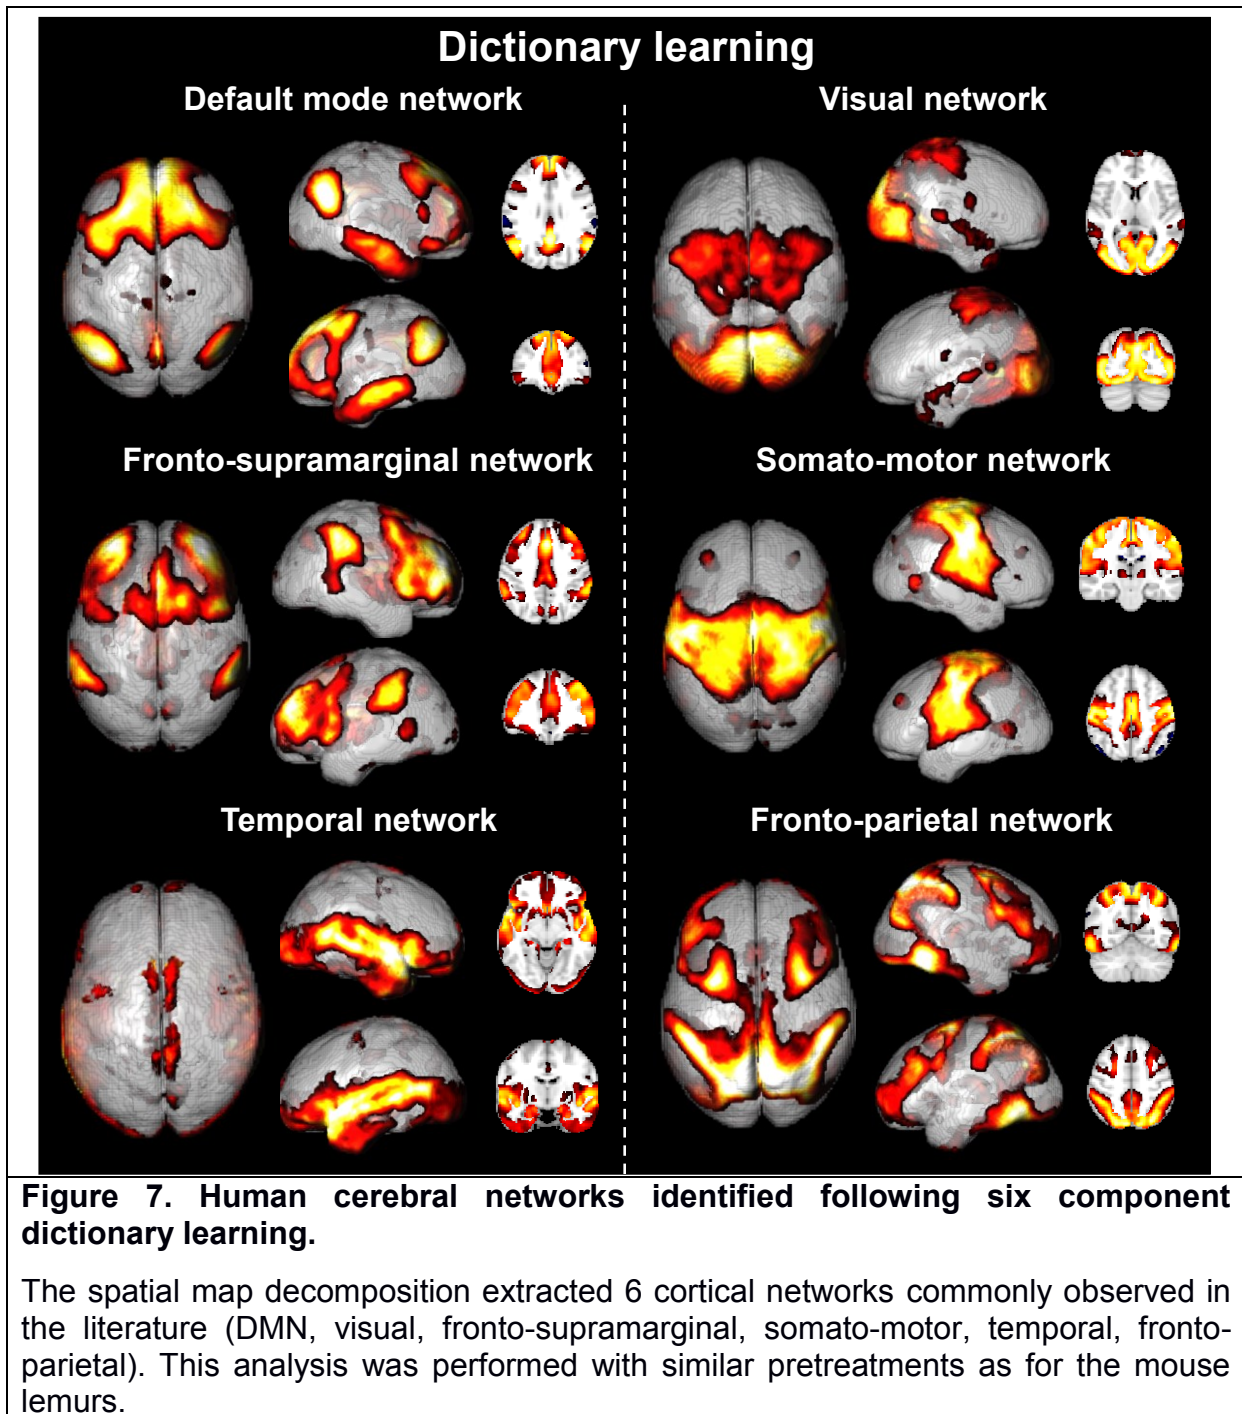

## 285 2.5. Functional hubs and small-worldness features of human brains

286 Eigenvector centrality and network topology were evaluated in humans using the  
 287 same procedures as for mouse lemurs. Eigenvector centrality was presented as  
 288 histograms (Fig. 8) or as the size of the nodes in the graphical representation of the  
 289 networks (Suppl. Fig. 3). The 3 nodes presenting the highest eigenvector centrality  
 290 were the parietal inferior (right and left) and the precuneus posterior. Then the next  
 291 hubs were located in the middle frontal cortex (left), the angular region (left) and the  
 292 posterior cingulum cortex. All these regions except the middle frontal cortex belong to  
 293 the DMN. Regarding network topology, as expected we found small-world properties  
 294 in the human brain ( $\sigma = 1.1$  and  $\omega = 0.08$ ).

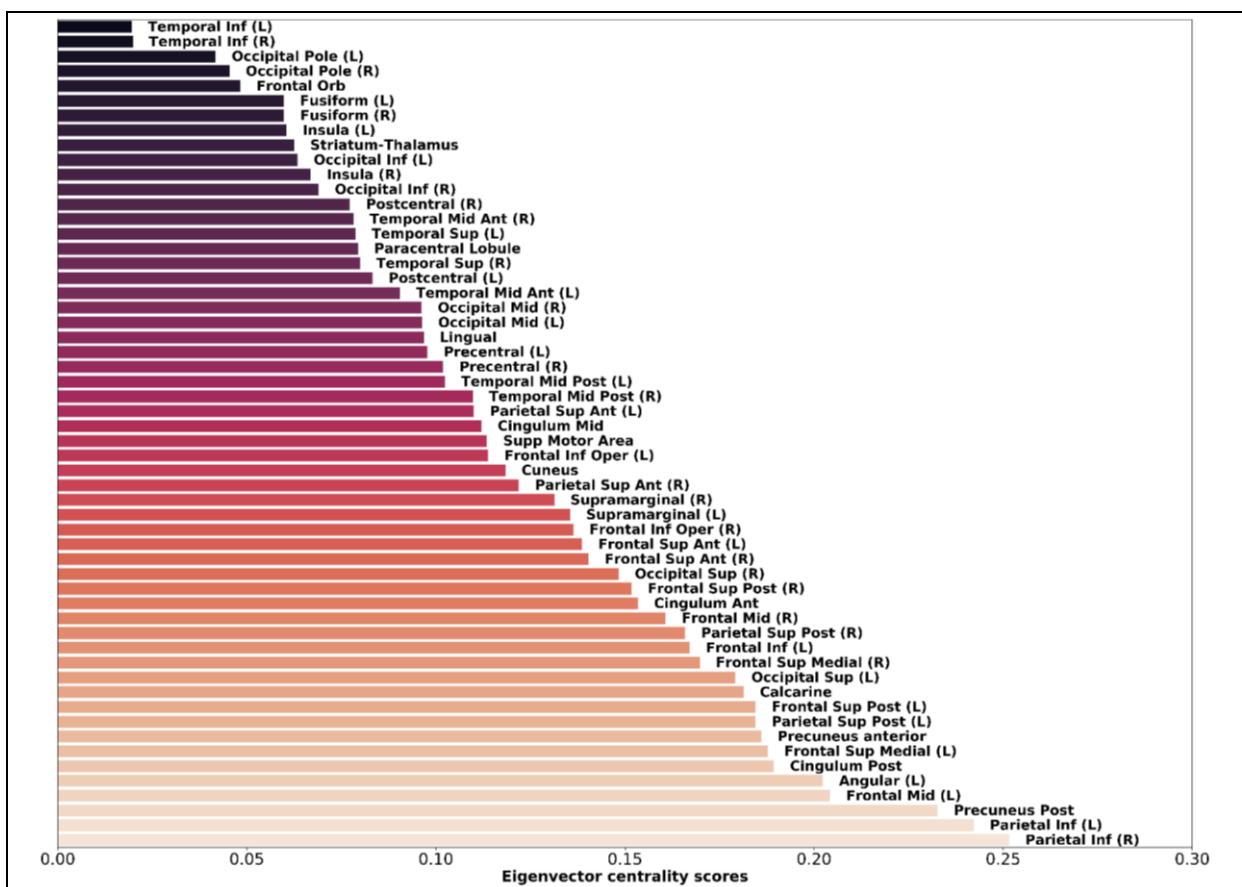

**Figure 8. Eigenvalue centrality scores, reflecting "hubness", in human brain regions.**

The 3 nodes presenting the highest eigenvector centrality were the parietal inferior (right and left) and the precuneus posterior. Then the next hubs were located in the middle frontal cortex (left), the angular region (left) and the posterior cingulum cortex.

295

## 296 **3. Discussion**

297 This study provides a detailed characterisation of the organisation of functional  
298 networks in mouse lemur primates under isoflurane sedation. Complementary  
299 analyses based on dictionary learning, seed-based studies and graph analysis  
300 highlighted 48 local functional regions that could be grouped into several large scale  
301 networks. We also identified the main hubs and small-world characteristics of mouse  
302 lemur brains. Human brain networks were also analysed with algorithms similar to  
303 those used in lemurs in order to compare networks in both species.

### 304 **3.1. Parcellation of functional regions within mouse lemur brains**

305 Up to now, description of mouse lemur functional organisation was based on  
306 cytoarchitectonic atlases (Bons et al., 1998; Le Gros Clark, 1931; Nadkarni et al.,  
307 2018). Here, using dictionary learning with a large number of components, we  
308 created a 3D map of 48 local functional regions. The quality of this functional atlas  
309 was supported by the bilateralism of the extracted regions. One of the strengths of  
310 this functional map is that it can be used to create a whole brain graph that relies on  
311 brain function rather than on anatomical boundaries. Studies of animal resting state  
312 networks often used regions of interest based on anatomical atlases (Li and Zhang,  
313 2018), as opposed to functional atlases. The latter approach is preferable since  
314 anatomical boundaries do not necessarily correspond to underlying brain function.  
315 Therefore, regions of interest based on anatomical atlases display less signal  
316 homogeneity and so increase non-specific signal (Craddock et al., 2012). The  
317 second advantage of functional atlases is that no predetermined anatomical atlas is  
318 required during the analysis. Consequently, the independence of our pipeline  
319 provides the capacity to build brain networks in species that have not been fully  
320 investigated.

## 321 3.2. Modular organisation of mouse lemur brains

322 High modularity is an important principle of brain organisation (Bullmore and  
323 Sporns, 2009). It can be measured with modularity of a partition (Q). Here we found  
324  $Q=0.43$  in mouse lemurs. This value is consistent with Q values reported in rats  
325 ( $Q=0.39$  (D'Souza et al., 2014)), other non-human primates ( $0.33 < Q < 0.54$  (Shen  
326 et al., 2012)) or humans in our study ( $Q = 0.56$ ) and indicates that the mouse lemur  
327 brain can be partitioned into modules. Using graph analysis, we identified six cortical  
328 and subcortical modules that corresponded to large scale networks. This  
329 organisation into six modules is consistent with the number of modules reported in  
330 rats ( $n=6$  (D'Souza et al., 2014)), other non-human primates (for example  $n=4$  (Shen  
331 et al., 2012) or  $n=7$  (Grayson et al., 2016) in *Macaca fascicularis*), or humans in our  
332 study ( $n=6$ ).

## 333 3.3. Characterisation of large scale networks in mouse lemur brains

### 334 3.3.1. Multi-method approach of resting state analysis in animals

335 Whole brain networks can be decomposed into large scale networks. However,  
336 there are no absolute frontiers between these large scale networks due to the  
337 gradualness of the interactions between the different regions of the brain. Several  
338 methods, such as dictionary learning, graph analysis and seed-based studies can be  
339 used to identify these large scale networks in mammal brains. They rely on various  
340 mathematical bases associated with various sensitivities to image artefacts (Power et  
341 al., 2014). Also, these methods have diverse abilities to classify brain regions into  
342 networks. For example, graph analysis attributes each region to one and only one  
343 network while dictionary learning and seed-based analysis can attribute a region to  
344 several networks. In most resting state fMRI studies in animals, neuronal networks  
345 are identified on the basis of a single method. Here we showed that different  
346 methods do not detect exactly the same networks. However, networks identified with  
347 each method display a strong overlap. Functional regions included in a network by  
348 several methods represent the more robust parts of the network. Thus, we propose a  
349 first classification of the mouse lemur networks that takes into account only regions  
350 identified by two or three methods (Fig. 9, Suppl. Table 3). An overview of each  
351 network is presented in the following paragraphs.

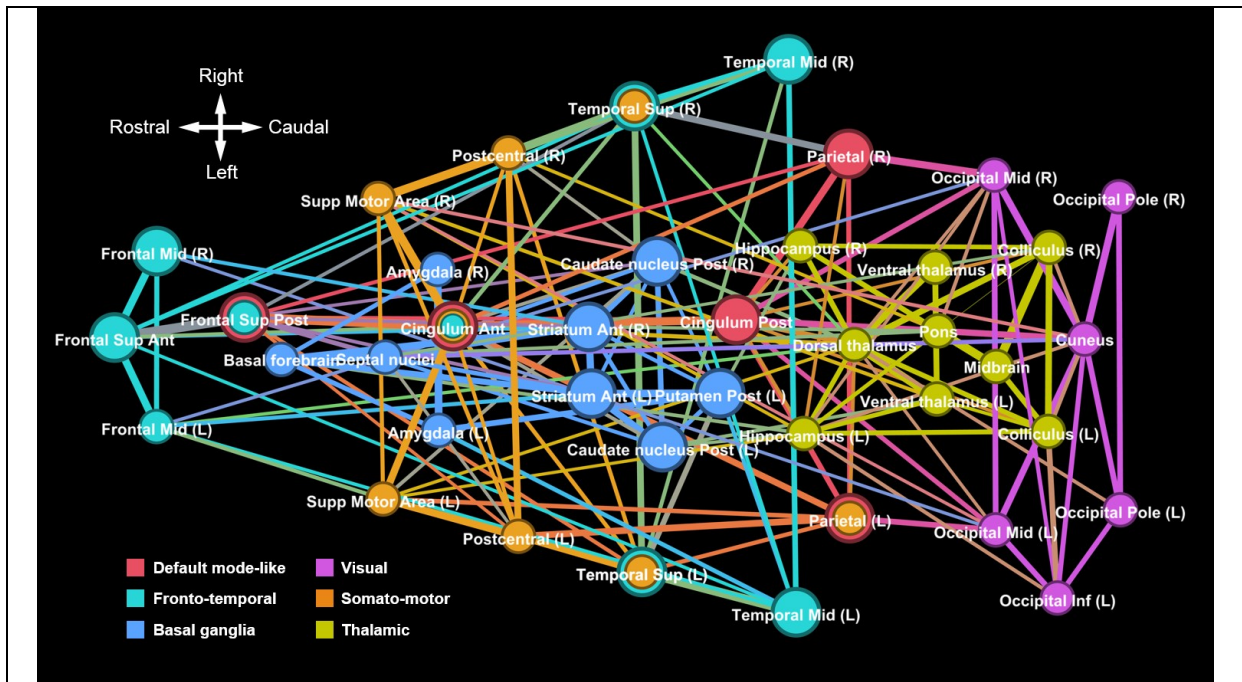

**Figure 9. Most robust functional networks identified in mouse lemurs using two or three network identification methods.**

Regions from the DMN, visual, fronto-temporal, somato-motor, basal ganglia and thalamic networks that could be identified by two or three network identification methods are considered as robustly associated to a network and are displayed on this figure. For each network, edges were reported from those identified with graph analysis.

352

### 353 3.3.2. Default-mode-like network

354 The DMN is one of the most studied networks in humans (Hampson et al., 2006)  
 355 and other mammals including rodents (Lu et al., 2012) and non-human primates (J.  
 356 L. Vincent et al., 2007). It plays a critical role in several physiological and pathological  
 357 processes such as Alzheimer's or Parkinson's diseases (Buckner et al., 2005; Gao  
 358 and Wu, 2016). In mouse lemurs, four regions of this network were detected with  
 359 network identification methods: anterior and posterior cingulum cortices, superior  
 360 posterior frontal cortex and parietal cortex. In several species, these regions are  
 361 reported to be part of the default mode network (Belcher et al., 2013; J. L. Vincent et  
 362 al., 2007).

363 In humans and other mammals, the DMN contains highly connected hub nodes.  
 364 In the mouse lemur brain, we also found that it contained the most connected nodes.  
 365 Given the importance of this network it was critical to characterize it in the mouse  
 366 lemur, which is widely used as a model of neurodegenerative diseases (Kraska et al.,  
 367 2011; Mestre-Frances et al., 2018).

368

### 369 3.3.3. Fronto-temporal network

370 The fronto-temporal network was found in mouse lemurs with dictionary learning  
371 and seed-based analysis, but was split into two networks (frontal and temporal) with  
372 graph analysis. One of its components, the superior temporal cortex, was a strong  
373 hub in the mouse lemur brain. In primates, these regions are reported to be part of  
374 the executive network (Hutchison et al., 2012)

### 375 3.3.4. Networks specialized in sensory and motor information processing

376 We also identified networks that could be classified as externally-driven. The first  
377 one is the visual network. It involved mainly occipital areas. This network has been  
378 described in numerous primates under task and rest conditions (Belcher et al., 2013).  
379 The second externally-driven network is the somato-motor network. It has also been  
380 widely defined in humans (Beckmann et al., 2005), primates (Nelissen and Vanduffel,  
381 2011), and many other mammals (Sierakowiak et al., 2015). It integrates sensory  
382 input and motor commands. In mouse lemurs, we found that this network contains  
383 several hubs such as the anterior cingulum cortex, the superior motor area and the  
384 postcentral cortices.

### 385 3.3.5. Subcortical networks

386 Finally, two networks were identified in subcortical areas. The first one involved  
387 the basal ganglia. Similar networks are described in primates (Belcher et al., 2013),  
388 and other mammals (Sierakowiak et al., 2015) and are involved in emotional,  
389 motivational, associative and cognitive functions (Herrero et al., 2002).

390 The second subcortical network involved several regions such as the ventral  
391 thalamus (a strong hub in mouse lemurs), dorsal thalamus, hippocampus, colliculus,  
392 pons and midbrain. It was called "thalamic network".

## 393 3.4. Small-worldness features of mouse lemur brains

394 We finally evaluated the small-worldness properties of the mouse lemur functional  
395 networks by calculating small-world coefficients  $\sigma$  and  $\omega$ . Our results attested that  
396 mouse lemur networks have small-world properties ( $\omega = 0.39$ ). Interestingly,  $\omega$  was  
397 much smaller in the human brain ( $\omega = 0.08$ ) than in the lemur brain suggesting  
398 stronger small-world properties in humans. The small-world configuration is  
399 considered as optimal for local information processing and for its global transfer.  
400 Indeed, small-world networks have the unique ability to have specialized regions  
401 while simultaneously exhibiting shared or distributed processing across all of the

402 communicating regions of a network (Telesford et al., 2011).

### 403 3.5. Cross species comparison: homologies and divergence between 404 humans and mouse lemur networks

405 In a last part of the study, cerebral networks were analyzed in humans with the  
406 same graph analysis and dictionary learning algorithms as the ones used in mouse  
407 lemurs. Two major differences were reported between the two species. First, large  
408 scale networks were only cortical in humans while they involved two subcortical  
409 networks in lemurs. Second, in humans, large scale networks involved more  
410 functional regions than in lemurs. This latter result is consistent with the stronger  
411 small-world organization in humans than in lemurs suggesting a better efficacy of  
412 whole brain networks in humans. These differences between the two species may be  
413 related to a better efficacy of neuronal networks in humans, but they could also be  
414 associated to different awareness levels as lemurs were anesthetized while humans  
415 were awake during image acquisition. Indeed, Barttfeld et al. compared connectivity  
416 measures in awake and anesthetized conditions in primates. They showed that under  
417 anesthesia, the more frequent functional connectivity patterns inherit the structure of  
418 anatomical connectivity and exhibit fewer small-world properties (Barttfeld et al.,  
419 2015).

420 Graph analysis revealed four similar modules (default mode-like, visual, frontal,  
421 and temporal networks) in mouse lemurs and humans, although their regional  
422 organization was not strictly identical. Two other modules detected in humans  
423 (somato-motor and temporo-insular) corresponded to networks that were not  
424 detected in lemurs. On the contrary, the two subcortical modules detected in lemurs  
425 (basal ganglia and thalamic networks) were not detected in humans. Because of the  
426 multiple regions involved in module description by graph analysis and because of the  
427 possibility to attribute a region to only one network with this method, it was difficult to  
428 further compare human and lemur networks with this technique.

429 Dictionary learning also revealed four similar networks (DMN, visual, fronto-  
430 temporal/supramarginal and somato-motor networks) in lemurs and humans (Table  
431 2; Suppl. Fig. 4). In both species, the DMN network involved the cingulum, frontal,  
432 and parietal cortices. In mouse lemurs, it involved the superior posterior frontal cortex  
433 that was probably subdivided in two functional regions (frontal superior medial and  
434 frontal superior posterior cortices) in humans. Other regions such as the temporal



435 cortex were included in the human DMN but not in the mouse lemur DMN.  
436 Interestingly, in both species, this network was the one in which highest hubness  
437 coefficients (eigenvectors) were detected. This reinforces the importance of this  
438 network for brain functional organization. In humans, the default mode network has  
439 been largely linked to self-referential thought, internal-oriented cognition and  
440 monitoring of the environment (Buckner et al., 2008). The strength and stability of this  
441 network in mouse lemurs under anaesthesia is consistent with the discovery of this  
442 network in many other anesthetized animals (J. L. Vincent et al., 2007). This  
443 suggests that it is an essential element of brain functional organization and that it  
444 may be dedicated to other tasks too.

445 In the visual network, occipital cortex was detected in both species. Additional  
446 more anterior-parietal regions such as the paracentral lobule and the postcentral  
447 were highlighted in humans. We cannot rule out that this wider extension in human  
448 dataset is not related to the wakefulness state as it induces a richer repertoire of  
449 functional configurations (Barttfeld et al., 2015).

450 In mouse lemurs, a network involving the anterior cingulum, frontal and temporal  
451 regions was classified as the fronto-temporal network. In humans, one network  
452 involving mostly the anterior cingulum and frontal regions could be homologous to  
453 this network. Interestingly, in lemurs, this networks also involved temporal (superior  
454 and medial temporal regions) while it involved parietal regions (supramarginal  
455 anterior and parietal inferior cortices) as well as additional regions (supplementary  
456 motor, cingulum median and opercular regions) in humans. This network could  
457 correspond to the control-executive network (Solé-Padullés et al., 2016). If the fronto-  
458 temporal network of mouse lemur is equivalent to the fronto-supramarginal human  
459 network, then this would suggest a shift of the functional region localized in the  
460 superior temporal area in lemurs towards a supramarginal location in humans.

461 The last comparable network was the somato-motor network. In humans it  
462 involved regions surrounding the central sulcus (precentral and postcentral regions)  
463 as well as the supplementary motor region. In lemurs, there is no central sulcus, but  
464 this network involved similar regions (precentral and postcentral regions) as well as  
465 the supplementary motor region. Interestingly, this part of the network seemed to  
466 have a more anterior position in the brain of lemurs than in humans. This is  
467 consistent with the more anterior part of the motor regions reported in lemurs by Le  
468 Gros Clark (Le Gros Clark, 1931) and Brodmann (Brodmann, 1999 (original in

469 1909)). This pattern is linked to the smaller size of the frontal region in lemurs as  
470 compared to humans. Finally, in humans, this region involved the paracentral and the  
471 precuneus anterior cortices while it involved the region classified as anterior cingulate  
472 cortex in the mouse lemur. These two regions are localized in the same area and we  
473 cannot rule out that the functional region classified as anterior cingulate cortex in  
474 lemur indeed involved the pre and post central lobule in addition to the anterior  
475 cingulate cortex.

### 476 3.6. Anaesthesia-related limitations

477 One of the objectives of this study was to describe for the first time neuronal  
478 networks in mouse lemurs. It was conducted on sedated animals using isoflurane  
479 with the lowest non-awakening isoflurane level possible for mouse lemurs (1.25%).  
480 Isoflurane is expected to decrease the functional connectivity but at high doses  
481 (superior to 1.5%) or after a long exposure (Hutchison et al., 2014; Li and Zhang,  
482 2018). Evaluating resting state networks in anesthetised and not in awake animals is  
483 an obvious limitation of the study (Schroeter et al., 2014). However, several animal  
484 studies showed that the major functional networks are preserved under anaesthesia  
485 (J. L. Vincent et al., 2007). Here, we confirm this assumption by describing several  
486 networks, including a DMN-like in anesthetised mouse lemurs. In the future, one may  
487 also focus on resting state fMRI in awake mouse lemurs to possibly evaluate more  
488 physiological brain states and increase the number of nodes associated with each  
489 identified network. Such an approach is challenging but has already been performed  
490 in marmosets (Belcher et al., 2013) and macaques (Goense et al., 2008).

|                                               | Mouse lemur |                       | Human                                                                       |                              |
|-----------------------------------------------|-------------|-----------------------|-----------------------------------------------------------------------------|------------------------------|
|                                               | Label       |                       |                                                                             | Label                        |
| <b>Default mode</b>                           | (8)         | Cingulum Post         |                                                                             | (20)                         |
|                                               | (5)         | Cingulum Ant          |                                                                             | (7)                          |
|                                               | (3)         | Frontal Sup Post      | Frontal Sup Post (R&L)<br>Frontal Sup medial (R&L)                          | (2)<br>(3)                   |
|                                               |             |                       | Frontal Inf (L)                                                             | (35)                         |
|                                               | (9)         | Parietal (R&L)        | Parietal Inf (R&L)<br>Angular (L)                                           | (14)<br>(15)                 |
|                                               |             |                       | Temporal Mid Ant(R&L)<br>Occipital Sup (R&L)<br>Precuneus Post<br>Calcarine | (23)<br>(27)<br>(18)<br>(30) |
| <b>Visual</b>                                 | (16)        | Occipital Pole (R&L)  |                                                                             | (33)                         |
|                                               | (10)        | Occipital Mid (R&L)   |                                                                             | (28)                         |
|                                               | (14)        | Occipital Inf (R&L)   |                                                                             | (29)                         |
|                                               | (15)        | Cuneus                |                                                                             | (26)                         |
|                                               |             |                       | Calcarine                                                                   | (30)                         |
|                                               |             |                       | Lingual                                                                     | (31)                         |
|                                               |             |                       | Fusiform (R&L)                                                              | (32)                         |
|                                               |             |                       | Paracentral lobule<br>Postcentral (R&L)                                     | (19)<br>(11)                 |
| <b>Fronto-temporal / Fronto-supramarginal</b> | (5)         | Cingulum Ant          |                                                                             | (7)                          |
|                                               | (1)         | Frontal Sup Ant (R&L) |                                                                             | (1)                          |
|                                               | (3)         | Frontal Sup Post      | Frontal Sup Post (R)<br>Frontal Sup medial (R)                              | (2)<br>(3)                   |
|                                               | (2)         | Frontal Mid (R&L)     | Frontal Mid (R&L)<br>Frontal Inf operc (R&L)                                | (4)<br>(5)                   |
|                                               |             |                       | Frontal Inf (L)                                                             | (35)                         |
|                                               |             |                       | Supp motor area                                                             | (12)                         |
|                                               |             |                       | Cingulum Mid                                                                | (8)                          |
|                                               | (11)        | Temporal Sup (R&L)    | Supramarginal (R&L)                                                         | (21)                         |
|                                               |             |                       | Parietal Inf (R)                                                            | (14)                         |
|                                               | (12)        | Temporal Mid (R&L)    | Striatum-thalamus                                                           | (34)                         |
| <b>Somato-motor</b>                           | (6)         | Precentral (R&L)      |                                                                             | (10)                         |
|                                               | (7)         | Postcentral (R&L)     |                                                                             | (11)                         |
|                                               | (4)         | Supp motor area (R&L) |                                                                             | (12)                         |
|                                               | (9)         | Parietal (L)          | Parietal Sup Ant (R&L)                                                      | (13)                         |
|                                               | (5)         | Cingulum Ant          | Paracentral lobule<br>Precuneus Ant                                         | (19)<br>(17)                 |
|                                               | (11)        | Temporal Sup (R&L)    | Temporal Sup (R&L)                                                          | (25)                         |
|                                               |             |                       | Supramarginal (R&L)                                                         | (21)                         |

491 **Table 2. Comparison of the regions belonging to the different networks**  
 492 **extracted in mouse lemurs and humans.**

493 Regions that were identified with different methods are grouped within a single case.  
 494 The 3D functional atlas of each species was pasted on different networks obtained  
 495 by dictionary learning. A region was considered to belong to a network when more  
 496 than 30% of its volume belonged to this network. The fit between two regions with  
 497 different names was based on the anatomical proximity. Labels represent the number  
 498 corresponding to this region in Figure 2 for lemurs and Supplementary Figure 2 for  
 499 humans.

## 500 **4. Conclusion**

501 This study provides the first characterisation of functional brain networks in  
502 mouse lemur primates. Local functional regions were identified without using any  
503 anatomical atlas. Six large scale networks were identified using several  
504 complementary data-driven and hypothesis-based methods. Networks identified with  
505 each method displayed a strong overlap and we propose a first classification of the  
506 most robust mouse lemur networks by selecting only regions identified by two or  
507 three methods. We also proposed a second validation method by comparing  
508 networks in lemurs and human brains. Indeed, a strong homology was reported  
509 between well characterized human cortical networks and lemur cortical networks.  
510 This further suggests the accuracy of the identified mouse lemur networks. The  
511 mouse lemur brain displayed small-world features leading to optimal information  
512 transfer. Finally, critical hubs were detected and involved the posterior and anterior  
513 cingulate cortices, the central prefrontal cortex, and the dorsal thalamus.

514 The mouse lemur is an interesting primate because of its key position in the  
515 phylogenetic tree, rodent-like small size and nocturnal and arboreal lifestyle. The 3D  
516 functional atlas and resting state network maps are freely available at  
517 [https://www.nitrc.org/projects/fmri\\_mouselemur/](https://www.nitrc.org/projects/fmri_mouselemur/). The imaging tools used to create  
518 and manipulate the template are also available (<https://sammba-mri.github.io>).

## 519 **5. Materials and methods**

### 520 **5.1. Animals and breeding**

521 This study was carried out in accordance with the recommendations of the  
522 European Communities Council directive (2010/63/EU). The protocol was approved  
523 by the local ethics committees CEtEA-CEA DSV IdF (authorization  
524 201506051736524 VI (APAFIS#778)). All mouse lemurs studied were born in the  
525 laboratory breeding colony of CNRS/MNHN in Brunoy, France (UMR 7179  
526 CNRS/MNHN) and bred in our laboratory (Molecular Imaging Research Center, CEA,  
527 Fontenay-aux-Roses).

528 Sixteen mouse lemurs (12 males and 4 females) were initially included in this  
529 study. Two females that presented brain lesions on anatomical MRI were excluded  
530 from the analysis. The 14 analysed animals ranged from 0.9 to 3.1 years old  
531 (mean±SD: 1.7±0.7) (Suppl. Table 1). Housing conditions were cages containing one

532 or two lemurs with jumping and hiding enrichment, temperature 24–26°C, relative  
533 humidity 55% and seasonal lighting (summer: 14 hours of light/10 hours of dark;  
534 winter: 10 hours of light/14 hours of dark). Food consisted of fresh apples and a  
535 homemade mixture of bananas, cereals, eggs and milk. Animals had free access to  
536 tap water. None of the animals had previously been involved in pharmacological trials  
537 or invasive studies.

## 538 5.2. Animal preparation and MRI acquisition

539 Each animal was scanned twice with an interval of 6 months. All scanning was  
540 under isoflurane anaesthesia at 1.25-1.5% in air, with respiratory rate monitored to  
541 confirm animal stability until the end of the experiment. Body temperature was  
542 maintained by an air heating system at 32°C, inducing a natural torpor in mouse  
543 lemurs (Aujard and Vasseur, 2001). This has the advantage of allowing a low  
544 anaesthesia level without reawakening.

545 The MRI system was an 11.7 Tesla Bruker BioSpec (Bruker, Ettlinger, Germany)  
546 running ParaVision 6.0.1. Anatomical images were acquired using a T2-weighted  
547 multi-slice multi-echo (MSME) sequence: TR = 5000 ms, TE = 17.5 ms, 6 echoes,  
548 inter-echo time = 5 ms, FOV = 32 × 32 mm, 75 slices of 0.2 mm thickness, resolution  
549 = 200 µm isotropic, acquisition duration 10 min. Resting state time series data were  
550 acquired using a gradient-echo EPI sequence: TR = 1000 ms, TE = 10.0 ms, flip  
551 angle = 90°, repetitions = 450, FOV = 30 × 20 mm, 23 slices of 0.9 mm thickness and  
552 0.1 mm gap, resolution = 312 × 208 × 1000 µm, acquisition duration 7m30s.

## 553 5.3. MRI acquisition in humans

554 Forty-two healthy participants from the 'Imagerie Multimodale de la Maladie  
555 d'Alzheimer à un stade Précoce' (IMAP) study (Caen) were included in the present  
556 study (18 males and 24 females ranging from 41 to 60 years old (mean±SD:  
557 50±5.9)). All participants were scanned on a 3.0 T scanner (Philips Achieva,  
558 Amsterdam, Netherlands) at the Cyceron Center (Caen, France). Anatomical T1-  
559 weighted images were acquired using a 3D fast-field echo sequence (3D-T1-FFE  
560 sagittal TR = 20 ms, TE = 4.6 ms, flip angle = 10°, 180 slices of 1 mm with no gap,  
561 FOV = 256 × 256 mm<sup>2</sup>, in-plane resolution = 1 × 1 mm<sup>2</sup>). Resting state time series  
562 data were acquired using an interleaved 2D T2\* SENSE EPI (2D-T2\*-FFE-EPI axial,  
563 SENSE = 2; TR = 2382 ms; TE = 30 ms; flip angle = 80°; 42 slices of 2.8 mm with no  
564 gap, repetitions = 450, FOV = 224 × 224 mm<sup>2</sup>, in plane resolution = 2.8 × 2.8 mm<sup>2</sup>,

565 acquisition duration = 11.5 min). Head motion was minimized with foam pads.  
566 Participants were equipped with earplugs and the scanner room's light was turned  
567 off. During this acquisition, participants were asked to keep their eyes closed and  
568 relax without falling asleep.

## 569 5.4. MRI pre-processing

### 570 5.4.1. Mouse lemur data

571 Scanner data were exported as DICOM files then converted into NIFTI-1 format.  
572 Then spatial pre-processing was performed using the python module `sammba-mri`  
573 (SmAll MaMmals BrAin MRI; <http://sammba-mri.github.io>) which, using `nipype` for  
574 pipelining (Gorgolewski et al., 2011), leverages AFNI (Cox, 1996) for most steps and  
575 RATS (Oguz et al., 2014) for brain extraction. Anatomical images were mutually  
576 registered to create a study template, which was further registered to a high  
577 resolution anatomical mouse lemur template (Nadkarni et al., 2018). Resting state  
578 images were corrected for slice timing (interleaved), motion, and B0 distortion (per-  
579 slice registration to respective anatomicals), then all brought into the same space of  
580 the mouse lemur template by successive application of the individual anatomical to  
581 study template and study template to mouse lemur atlas transforms. Functional  
582 images were further pretreated using `Nilearn` (Abraham et al., 2014). Nuisance signal  
583 regression was applied including a linear trend as well as 24-motion confounds (6  
584 motion parameters, those of the preceding volume, plus each of their squares  
585 (Friston et al., 1994)). Images were then spatially smoothed with a 0.9 mm full-width  
586 at half-maximum Gaussian filter. The first 10 volumes were excluded from analysis to  
587 ensure steady-state magnetization.

### 588 5.4.2. Human data

589 Artefacts were inspected in individual datasets using the `TSDiffAna` routines  
590 (<http://imaging.mrc-cbu.cam.ac.uk/imaging/DataDiagnostics>). Datasets displaying  
591 significant movements ( $> 1.5^\circ$  rotation or  $> 3$  mm translation) and abnormal variance  
592 distribution and/or artefacted were excluded from the analysis. Data were then  
593 preprocessed as defined in Landeau *et al.* (Landeau et al., 2017) with slice timing  
594 correction, realignment to the first volume and spatial normalization within native  
595 space to correct for distortion effects. EPI volumes were registered to their own high  
596 resolution anatomical image and then registered and normalized to MNI template  
597 space. Nuisance signal regression was applied including a linear trend as well as 24-

598 motion confounds (6 motion parameters, those of the preceding volume, plus each of  
599 their squares (Friston et al., 1994)). Images were then spatially smoothed with a 2  
600 mm full-width at half-maximum Gaussian filter.

## 601 5.5. Identification of functional regions by dictionary learning and creation of 602 a 3D functional atlas

603 Multi-animal dictionary learning was performed with Nilearn (Mensch et al., 2016)  
604 on preprocessed resting state functional MR images. A mask excluding the corpus  
605 callosum, hindbrain, ventricles and three systematically artefacted regions (olfactory  
606 bulb, ventral entorhinal cortex and prepiriform cortex) was used to restrict functional  
607 data to non-noise voxels prior to dictionary learning analysis. During a pilot  
608 investigation, several analyses were performed using 20, 30, 35, 40, 45, 50, and 60  
609 sparse components (SCs). The study based on 35 SCs was selected for the final  
610 analysis as it highlighted either unilateral local functional regions or bilateral regions.  
611 Moreover, the extracted components matched well to anatomy (Nadkarni et al.,  
612 2018). The 35 SCs were used to create a 3D functional atlas of the mouse lemur  
613 brain. Each bilateral SC was split into two unilateral regions. Regions smaller than 5  
614 mm<sup>3</sup> were excluded leading to 48 local functional regions. Each region was then  
615 named using ITK-SNAP to create a 3D functional atlas (Yushkevich et al., 2006). The  
616 same procedure than in lemurs was applied to process human fMRI data. We used  
617 35 SCs and a grey matter mask without hindbrain.

## 618 5.6. Identification of large scale networks

### 619 5.6.1. Connectivity matrix based on functional atlas

620 Partial correlation matrices were created using fully preprocessed MR images by  
621 calculating the partial correlation coefficients between BOLD MR signal timecourses  
622 within each region of the 3D functional atlas. Partial correlations were used because  
623 they select direct associations between regions and allow the control of indirect  
624 correlations (Mechling et al., 2014). Individual partial correlation matrices were  
625 computed from shrunk covariance matrices using the Ledoit and Wolf shrinkage  
626 coefficient (Ledoit and Wolf, 2004) as recommended by Varoquaux et al. (Varoquaux  
627 et al., 2012) and Brier et al. (Brier et al., 2015). Partial correlation coefficients were  
628 then Fisher's z-transformed. Values from different animals were averaged and  
629 thresholded based on a one-tailed *t*-test ( $p \leq 0.01$ ) (Mechling et al., 2014).

## 630 5.6.2. Modularity and large scale network identification by graph theory 631 analysis

632 The modularity of a partition (Q) is the degree to which a network can be  
633 subdivided into non-overlapping groups of nodes (D. B. Vincent et al., 2008). The  
634 modularity of a partition as well as an optimal segregation of the whole brain network  
635 into modules were calculated using Gephi 0.9.2 (Bastian et al., 2009).

## 636 5.6.3. Large scale network identification by dictionary learning analysis

637 A second dictionary analysis was performed in mouse lemurs and humans using  
638 a smaller number of SCs in order to highlight large networks and to compare them.  
639 Six SCs were used based on the 6 modules found with the graph theory analysis  
640 (see Results). In humans, a mask excluding the hindbrain and the white matter was  
641 used prior to the analysis to compare the dictionary learning of the two species in a  
642 similar space.

## 643 5.6.4. Large scale network identification by seed-based analysis

644 Seeds corresponded to each region of the 3D functional atlas. The BOLD signal  
645 was averaged within each seed. The functional connection between the seed's mean  
646 BOLD signal and the BOLD signal in any voxel of the brain was estimated using a  
647 first-level general linear model (Nistats (Abraham et al., 2014)). The within-animal  
648 effect (*i.e.* the two series of MR images from each animal) was entered as a predictor  
649 (design matrix) and the mean seed time course as regressor. The model directly  
650 returned a fixed effect of the seed across the two sessions, producing 14 z-statistic  
651 maps. The functional regions previously identified were used as seeds. For each  
652 seed, a visual inspection of the animal mean z-statistic maps allowed the selection of  
653 four distinct large scale networks that were spread over the whole brain.

## 654 5.7. Identification of functional regions from dictionary-learning and seed- 655 based maps

656 Dictionary learning and seed-based analysis produced maps showing pixels  
657 belonging to different networks. These maps were extracted and pasted into the 3D  
658 functional atlas. A brain region was considered to be part of a specific network when  
659 the volume of labelled voxels within the map occupied at least 30% of that region.

## 660 5.8. Evaluation of functional hubness and small-worldness features of mouse 661 lemur brains by graph theory analysis

662 We consider in this analysis the absolute value of the correlation coefficient as



663 performed routinely in human fMRI graph theory studies (De Vico Fallani et al.,  
664 2014).

### 665 5.8.1. Brain hubs in mouse lemurs

666 Eigenvector centrality, a measure of "hubness", was measured using NetworkX  
667 (Hagberg et al., 2008).

### 668 5.8.2. Small-worldness of mouse lemur brain networks

669 Network topology can be characterized using two small-world coefficients ( $\sigma$  and  
670  $\omega$ ) (NetworkX (Hagberg et al., 2008)).

671  $\sigma$  is defined as  $\sigma = \frac{C/C_{rand}}{L/L_{rand}}$  (Watts and Strogatz, 1998)

672  $\omega$  is defined as  $\omega = \frac{L}{L_{rand}} - \frac{C}{C_{rand}}$  (Telesford et al., 2011).

673 With C and L being, respectively, the average clustering coefficient (a measure of  
674 network segregation) and the average shortest path length (a measure of integration)  
675 of the network.  $C_{rand}$  and  $L_{rand}$  are their equivalent derived random networks.  
676 Small-world networks have  $\sigma$  values superior to 1 and  $\omega$  values close to 0 (Telesford  
677 et al., 2011).

## 678 6. Acknowledgements

679 We thank the France-Alzheimer Association, Plan Alzheimer Foundation,  
680 Neuratris and the French Public Investment Bank's "ROMANE" program for funding  
681 this study. We thank all the persons who contributed to IMAP+ data acquisition and  
682 analyses: Florence Mézenge, Renaud La Joie, Julie Gonneaud, Audrey Perrotin,  
683 Robin de Flores, Clémence Tomadesso, Justine Mutlu, Nicolas Villain, Marine  
684 Fouquet, Katell Mevel, Francis Eustache, Béatrice Desgranges, Stéphanie Egret,  
685 Vincent de La Sayette, Fausto Viader, Alice Pélerin, Malo Gaubert, Géraldine  
686 Poisnel, Anne Quillard, Ahmed Abbas, Louisa Barré, Alain Manrique, Florence  
687 Pasquier, the Cyceron staff members; and the volunteers who were included in this  
688 study.

## 689 7. Competing interests

690 The authors do not have financial and non-financial competing interests in relation  
691 to the work described.

692

## 693 8. References

- 694 Abraham, A., Pedregosa, F., Eickenberg, M., Gervais, P., Mueller, A., Kossaifi, J.,  
695 Gramfort, A., Thirion, B., & Varoquaux, G. (2014). Machine learning for  
696 neuroimaging with scikit-learn. *Front Neuroinform*, 8, 14.  
697 doi:10.3389/fninf.2014.00014
- 698 Aujard, F., & Vasseur, F. (2001). Effect of ambient temperature on the body  
699 temperature rhythm of male gray mouse lemurs (*microcebus murinus*). *Int J*  
700 *Primatol*, Vol. 22, No. 1, 2001. doi:10.1023/A:1026461914534
- 701 Barttfeld, P., Uhrig, L., Sitt, J. D., Sigman, M., Jarraya, B., & Dehaene, S. (2015).  
702 Signature of consciousness in the dynamics of resting-state brain activity.  
703 *Proc Natl Acad Sci U S A*, 112(3), 887-892. doi:10.1073/pnas.1418031112
- 704 Bastian, M., Heymann, S., & Jacomy, M. (2009). *Gephi: an open source software for*  
705 *exploring and manipulating networks*. International AAAI Conference on  
706 Weblogs and Social Media, San Jose, California, USA.  
707 <https://www.aaai.org/ocs/index.php/ICWSM/09/paper/view/154>.  
708 doi:10.13140/2.1.1341.1520
- 709 Beckmann, C. F., DeLuca, M., Devlin, J. T., & Smith, S. M. (2005). Investigations into  
710 resting-state connectivity using independent component analysis. *Philos Trans*  
711 *R Soc Lond B Biol Sci*, 360(1457), 1001-1013. doi:10.1098/rstb.2005.1634
- 712 Belcher, A. M., Yen, C. C., Stepp, H., Gu, H., Lu, H., Yang, Y., Silva, A. C., & Stein,  
713 E. A. (2013). Large-scale brain networks in the awake, truly resting marmoset  
714 monkey. *J Neurosci*, 33(42), 16796-16804. doi:10.1523/JNEUROSCI.3146-  
715 13.2013
- 716 Biswal, B., Yetkin, F. Z., Haughton, V. M., & Hyde, J. S. (1995). Functional  
717 connectivity in the motor cortex of resting human brain using echo-planar MRI.  
718 *Magn Reson Med*, 34(4), 537-541. doi:10.1002/mrm.1910340409
- 719 Bons, N., Silhol, S., Barbie, V., Mestre-Frances, N., & Albe-Fessard, D. (1998). A  
720 stereotaxic atlas of the grey lesser mouse lemur brain (*microcebus murinus*).  
721 *Brain Res Bull*, 46(1-2), 1-173. doi:10.1016/S0361-9230(97)00458-9
- 722 Brier, M. R., Mitra, A., McCarthy, J. E., Ances, B. M., & Snyder, A. Z. (2015). Partial  
723 covariance based functional connectivity computation using Ledoit-Wolf  
724 covariance regularization. *Neuroimage*, 121, 29-38.  
725 doi:10.1016/j.neuroimage.2015.07.039

- 726 Brodmann, K. (1999 (original in 1909)). Brodmann's localisation in the cerebral cortex  
727 [Vergleichende lokalisationslehre der grosshirnrinde in ihren prinzipien  
728 dargestellt auf grund des zellenbaus] (Imperial College Press ed.): Garey,  
729 Laurence J.
- 730 Buckner, R. L., Andrews-Hanna, J. R., & Schacter, D. L. (2008). The brain's default  
731 network. *Annals of the New York Academy of Sciences*, 1124(1), 1-38.  
732 doi:10.1196/annals.1440.011
- 733 Buckner, R. L., Snyder, A. Z., Shannon, B. J., LaRossa, G., Sachs, R., Fotenos, A.  
734 F., Sheline, Y. I., Klunk, W. E., Mathis, C. A., Morris, J. C., & Mintun, M. A.  
735 (2005). Molecular, structural, and functional characterization of Alzheimer's  
736 disease: evidence for a relationship between default activity, amyloid, and  
737 memory. *J Neurosci*, 25(34), 7709-7717. doi:10.1523/JNEUROSCI.2177-  
738 05.2005
- 739 Bullmore, E., & Sporns, O. (2009). Complex brain networks: graph theoretical  
740 analysis of structural and functional systems. *Nat Rev Neurosci*, 10(3), 186-  
741 198. doi:10.1038/nrn2575
- 742 Burkart, J. M., Schubiger, M. N., & van Schaik, C. P. (2016). The evolution of general  
743 intelligence. *Behavioral and Brain Sciences*, 40, e195.  
744 doi:10.1017/S0140525X16000959
- 745 Cox, R. W. (1996). AFNI: software for analysis and visualization of functional  
746 magnetic resonance neuroimages. *Comput Biomed Res*, 29(3), 162-173.  
747 doi:10.1006/cbmr.1996.0014
- 748 Craddock, R. C., James, G. A., Holtzheimer, P. E., 3rd, Hu, X. P., & Mayberg, H. S.  
749 (2012). A whole brain fMRI atlas generated via spatially constrained spectral  
750 clustering. *Hum Brain Mapp*, 33(8), 1914-1928. doi:10.1002/hbm.21333
- 751 D'Souza, D. V., Jonckers, E., Bruns, A., Künnecke, B., von Kienlin, M., Van der  
752 Linden, A., Mueggler, T., & Verhoye, M. (2014). Preserved modular network  
753 organization in the sedated rat brain. *PLoS One*, 9(9), e106156.  
754 doi:10.1371/journal.pone.0106156
- 755 Damoiseaux, J. S., Rombouts, S. A., Barkhof, F., Scheltens, P., Stam, C. J., Smith,  
756 S. M., & Beckmann, C. F. (2006). Consistent resting-state networks across  
757 healthy subjects. *Proc Natl Acad Sci U S A*, 103(37), 13848-13853.  
758 doi:10.1073/pnas.0601417103
- 759 De Vico Fallani, F., Richiardi, J., Chavez, M., & Achard, S. (2014). Graph analysis of

- 760 functional brain networks: practical issues in translational neuroscience. *Philos*  
761 *Trans R Soc Lond B Biol Sci*, 369(1653). doi:10.1098/rstb.2013.0521
- 762 Djelti, F., Dhenain, M., Terrien, J., Picq, J. L., Hardy, I., Champeval, D., Perret, M.,  
763 Schenker, E., Epelbaum, J., & Aujard, F. (2016). Impaired fasting blood  
764 glucose is associated to cognitive impairment and cerebral atrophy in middle-  
765 aged non-human primates. *Aging (Albany NY)*, 9(1), 173-186.  
766 doi:10.18632/aging.101148
- 767 Friston, K. J., Holmes, A. P., Worsley, K. J., Poline, J. P., Frith, C. D., & Frackowiak,  
768 R. S. J. (1994). Statistical parametric maps in functional imaging: a general  
769 linear approach. *Hum. Brain Mapp.*, 2(4):189 - 210.  
770 doi:10.1002/hbm.460020402
- 771 Gao, L. L., & Wu, T. (2016). The study of brain functional connectivity in Parkinson's  
772 disease. *Transl Neurodegener*, 5, 18. doi:10.1186/s40035-016-0066-0
- 773 Gerits, A., Farivar, R., Rosen, B. R., Wald, L. L., Boyden, E. S., & Vanduffel, W.  
774 (2012). Optogenetically induced behavioral and functional network changes in  
775 primates. *Current Biology*, 22(18), 1722-1726. doi:10.1016/j.cub.2012.07.023
- 776 Ghahremani, M., Menon, R. S., Everling, S., & Hutchison, R. M. (2016).  
777 Frontoparietal functional connectivity in the common marmoset. *Cereb Cortex*,  
778 27(8), 3890-3905. doi:10.1093/cercor/bhw198
- 779 Goense, J. B., Ku, S. P., Merkle, H., Tolia, A. S., & Logothetis, N. K. (2008). fMRI of  
780 the temporal lobe of the awake monkey at 7 T. *Neuroimage*, 39(3), 1081-  
781 1093. doi:10.1016/j.neuroimage.2007.09.038
- 782 Gorgolewski, K., Burns, C. D., Madison, C., Clark, D., Halchenko, Y. O., Waskom, M.  
783 L., & Ghosh, S. S. (2011). Nipype: a flexible, lightweight and extensible  
784 neuroimaging data processing framework in python. *Front Neuroinform*, 5, 13.  
785 doi:10.3389/fninf.2011.00013
- 786 Grayson, D. S., Bliss-Moreau, E., Machado, C. J., Bennett, J., Shen, K., Grant, K. A.,  
787 Fair, D. A., & Amaral, D. G. (2016). The rhesus monkey connectome predicts  
788 disrupted functional networks resulting from pharmacogenetic inactivation of  
789 the amygdala. *Neuron*, 91(2), 453-466. doi:10.1016/j.neuron.2016.06.005
- 790 Hagberg, A. A., Schult, D. A., & Swart, P. J. (2008). *Exploring network structure,*  
791 *dynamics, and function using NetworkX*. Proceedings of the 7th Python in  
792 Science Conference, Pasadena, CA.
- 793 Hampson, M., Driesen, N. R., Skudlarski, P., Gore, J. C., & Constable, R. T. (2006).

- 794 Brain connectivity related to working memory performance. *J Neurosci*,  
795 26(51), 13338-13343. doi:10.1523/JNEUROSCI.3408-06.2006
- 796 Herrero, M. T., Barcia, C., & Navarro, J. M. (2002). Functional anatomy of thalamus  
797 and basal ganglia. *Childs Nerv Syst*, 18(8), 386-404. doi:10.1007/s00381-002-  
798 0604-1
- 799 Hutchison, R. M., Hutchison, M., Manning, K. Y., Menon, R. S., & Everling, S. (2014).  
800 Isoflurane induces dose-dependent alterations in the cortical connectivity  
801 profiles and dynamic properties of the brain's functional architecture. *Hum*  
802 *Brain Mapp*, 35(12), 5754-5775. doi:10.1002/hbm.22583
- 803 Hutchison, R. M., Mirsattari, S. M., Jones, C. K., Gati, J. S., & Leung, L. S. (2010).  
804 Functional networks in the anesthetized rat brain revealed by independent  
805 component analysis of resting-state fMRI. *J Neurophysiol*, 103(6), 3398-3406.  
806 doi:10.1152/jn.00141.2010
- 807 Hutchison, R. M., Womelsdorf, T., Gati, J. S., Leung, L. S., Menon, R. S., & Everling,  
808 S. (2012). Resting-state connectivity identifies distinct functional networks in  
809 macaque cingulate cortex. *Cereb Cortex*, 22(6), 1294-1308.  
810 doi:10.1093/cercor/bhr181
- 811 Kraska, A., Dorieux, O., Picq, J. L., Petit, F., Bourrin, E., Chenu, E., Volk, A., Perret,  
812 M., Hantraye, P., Mestre-Frances, N., Aujard, F., & Dhenain, M. (2011). Age-  
813 associated cerebral atrophy in mouse lemur primates. *Neurobiol Aging*, 32(5),  
814 894-906. doi:10.1016/j.neurobiolaging.2009.05.018
- 815 Landeau, B., Mutlu, J., Chételat, G., Desgranges, B., Gaubert, M., & de La Sayette,  
816 V. (2017). Distinct influence of specific versus global connectivity on the  
817 different Alzheimer's disease biomarkers. *Brain*, 140(12), 3317-3328.  
818 doi:10.1093/brain/awx279
- 819 Le Gros Clark, W. (1931). The brain of *microcebus murinus*. *Proc Zool Soc London*.  
820 doi:1931;101(2):463-86
- 821 Ledoit, O., & Wolf, M. (2004). A well-conditioned estimator for large-dimensional  
822 covariance matrices. *Journal of Multivariate Analysis*, 88(2), 365-411.  
823 doi:10.1016/S0047-259X(03)00096-4
- 824 Lee, M. H., Smyser, C. D., & Shimony, J. S. (2013). Resting-state fMRI: a review of  
825 methods and clinical applications. *AJNR Am J Neuroradiol*, 34(10), 1866.  
826 doi:10.3174/ajnr.A3263
- 827 Li, C. X., & Zhang, X. (2018). Evaluation of prolonged administration of isoflurane on

- 828 cerebral blood flow and default mode network in macaque monkeys  
829 anesthetized with different maintenance doses. *Neurosci Lett*, 662, 402-408.  
830 doi:10.1016/j.neulet.2017.10.034
- 831 Lu, H., Zou, Q., Gu, H., Raichle, M. E., Stein, E. A., & Yang, Y. (2012). Rat brains  
832 also have a default mode network. *Proc Natl Acad Sci U S A*, 109(10), 3979-  
833 3984. doi:10.1073/pnas.1200506109
- 834 Ma, Z., Perez, P., Ma, Z., Liu, Y., Hamilton, C., Liang, Z., & Zhang, N. (2018).  
835 Functional atlas of the awake rat brain: A neuroimaging study of rat brain  
836 specialization and integration. *Neuroimage*, 170, 95-112.  
837 doi:10.1016/j.neuroimage.2016.07.007
- 838 Mechling, A. E., Hubner, N. S., Lee, H. L., Hennig, J., von Elverfeldt, D., & Harsan, L.  
839 A. (2014). Fine-grained mapping of mouse brain functional connectivity with  
840 resting-state fMRI. *Neuroimage*, 96, 203-215.  
841 doi:10.1016/j.neuroimage.2014.03.078
- 842 Mensch, A., Varoquaux, G., & Thirion, B. (2016). *Compressed online dictionary*  
843 *learning for fast resting-state fMRI decomposition*. International Symposium  
844 on Biomedical Imaging, Prague, Czech Republic. [https://hal.archives-](https://hal.archives-ouvertes.fr/hal-01271033)  
845 [ouvertes.fr/hal-01271033](https://hal.archives-ouvertes.fr/hal-01271033). doi:10.1109/isbi.2016.7493501
- 846 Mestre-Frances, N., Serratrice, N., Gennetier, A., Devau, G., Cobo, S., Trouche, S.  
847 G., Fontes, P., Zussy, C., De Deurwaerdere, P., Salinas, S., Mennechet, F. J.,  
848 Dusonchet, J., Schneider, B. L., Saggio, I., Kalatzis, V., Luquin-Piudo, M. R.,  
849 Verdier, J. M., & Kremer, E. J. (2018). Exogenous LRRK2G2019S induces  
850 parkinsonian-like pathology in a nonhuman primate. *JCI Insight*, 3(14).  
851 doi:10.1172/jci.insight.98202
- 852 Mohan, A., Roberto, A. J., Mohan, A., Lorenzo, A., Jones, K., Carney, M. J., Liogier-  
853 Weyback, L., Hwang, S., & Lapidus, K. A. (2016). The significance of the  
854 default mode network (DMN) in neurological and neuropsychiatric disorders: a  
855 review. *Yale J Biol Med*, 89(1), 49-57.
- 856 Montgomery, S. H., Capellini, I., Barton, R. A., & Mundy, N. I. (2010). Reconstructing  
857 the ups and downs of primate brain evolution: implications for adaptive  
858 hypotheses and *Homo floresiensis*. *BMC Biol*, 8, 9. doi:10.1186/1741-7007-8-  
859 9
- 860 Nadkarni, N. A., Bougacha, S., Garin, C., Dhenain, M., & Picq, J. L. (2018). A 3D  
861 population-based brain atlas of the mouse lemur primate with examples of

- 862 applications in aging studies and comparative anatomy. *Neuroimage*, *185*, 85-  
863 95. doi:10.1016/j.neuroimage.2018.10.010
- 864 Nelissen, K., & Vanduffel, W. (2011). Grasping-related functional magnetic  
865 resonance imaging brain responses in the macaque monkey. *J Neurosci*,  
866 *31*(22), 8220-8229. doi:10.1523/jneurosci.0623-11.2011
- 867 Oguz, I., Zhang, H., Rumble, A., & Sonka, M. (2014). RATS: Rapid Automatic Tissue  
868 Segmentation in rodent brain MRI. *J Neurosci Methods*, *221*, 175-182.  
869 doi:10.1016/j.jneumeth.2013.09.021
- 870 Power, J. D., Schlaggar, B. L., & Petersen, S. E. (2014). Studying brain organization  
871 via spontaneous fMRI signal. *Neuron*, *84*(4), 681-696.  
872 doi:10.1016/j.neuron.2014.09.007
- 873 Raichle, M. E. (2011). The restless brain. *Brain Connect*, *1*(1), 3-12.  
874 doi:10.1089/brain.2011.0019
- 875 Sawiak, S. J., Picq, J. L., & Dhenain, M. (2014). Voxel-based morphometry analyses  
876 of in vivo MRI in the aging mouse lemur primate. *Front Aging Neurosci*, *6*, 82.  
877 doi:10.3389/fnagi.2014.00082
- 878 Schroeter, A., Schlegel, F., Seuwen, A., Grandjean, J., & Rudin, M. (2014).  
879 Specificity of stimulus-evoked fMRI responses in the mouse: the influence of  
880 systemic physiological changes associated with innocuous stimulation under  
881 four different anesthetics. *Neuroimage*, *94*, 372-384.  
882 doi:10.1016/j.neuroimage.2014.01.046
- 883 Shen, K., Bezgin, G., Hutchison, R. M., Gati, J. S., Menon, R. S., Everling, S., &  
884 McIntosh, A. R. (2012). Information processing architecture of functionally  
885 defined clusters in the macaque cortex. *J Neurosci*, *32*(48), 17465-17476.  
886 doi:10.1523/JNEUROSCI.2709-12.2012
- 887 Sierakowiak, A., Monnot, C., Aski, S. N., Uppman, M., Li, T. Q., Damberg, P., &  
888 Brene, S. (2015). Default mode network, motor network, dorsal and ventral  
889 basal ganglia networks in the rat brain: comparison to human networks using  
890 resting state-fMRI. *PLoS One*, *10*(3), e0120345.  
891 doi:10.1371/journal.pone.0120345
- 892 Solé-Padullés, C., Castro-Fornieles, J., de la Serna, E., Calvo, R., Baeza, I., Moya,  
893 J., Lázaro, L., Rosa, M., Bargalló, N., & Sugranyes, G. (2016). Intrinsic  
894 connectivity networks from childhood to late adolescence: Effects of age and  
895 sex. *Dev Cogn Neurosci*, *17*, 35-44. doi:10.1016/j.dcn.2015.11.004

- 896 Telesford, Q. K., Joyce, K. E., Hayasaka, S., Burdette, J. H., & Laurienti, P. J. (2011).  
897 The ubiquity of small-world networks. *Brain Connect*, 1(5), 367-375.  
898 doi:10.1089/brain.2011.0038
- 899 Tzourio-Mazoyer, N., Landeau, B., Papathanassiou, D., Crivello, F., Etard, O.,  
900 Delcroix, N., Mazoyer, B., & Joliot, M. (2002). Anatomical labeling of  
901 activations in SPM using a macroscopic anatomical parcellation of the MNI  
902 MRI single-subject brain. *Neuroimage*, 15(1), 273-289.  
903 doi:10.1006/nimg.2001.0978
- 904 Varoquaux, G., Gramfort, A., Pedregosa, F., Michel, V., & Thirion, B. (2011). Multi-  
905 subject dictionary learning to segment an atlas of brain spontaneous activity.  
906 *Inf Process Med Imaging*, 22, 562-573.
- 907 Varoquaux, G., Gramfort, A., Poline, J. B., & Thirion, B. (2012). Markov models for  
908 fMRI correlation structure: Is brain functional connectivity small world, or  
909 decomposable into networks? *J Physiol Paris*, 106(5-6), 212-221.  
910 doi:10.1016/j.jphysparis.2012.01.001
- 911 Vincent, D. B., Jean-Loup, G., Renaud, L., & Etienne, L. (2008). Fast unfolding of  
912 communities in large networks. *J Stat Mech Theory Exp*, 2008(10), P10008.
- 913 Vincent, J. L., Patel, G. H., Fox, M. D., Snyder, A. Z., Baker, J. T., Van Essen, D. C.,  
914 Zempel, J. M., Snyder, L. H., Corbetta, M., & Raichle, M. E. (2007). Intrinsic  
915 functional architecture in the anaesthetized monkey brain. *Nature*, 447(7140),  
916 83-86. doi:10.1038/nature05758
- 917 Watts, D. J., & Strogatz, S. H. (1998). Collective dynamics of 'small-world' networks.  
918 *Nature*, 393(6684), 440-442. doi:10.1038/30918
- 919 Yushkevich, P. A., Piven, J., Hazlett, H. C., Smith, R. G., Ho, S., Gee, J. C., & Gerig,  
920 G. (2006). User-guided 3D active contour segmentation of anatomical  
921 structures: significantly improved efficiency and reliability. *Neuroimage*, 31(3),  
922 1116-1128. doi:10.1016/j.neuroimage.2006.01.015
